# Supplementary material for: Unsymmetrically substituted side-bridged cyclam derivatives and their Cu(ii) and Zn(ii) complexes
Source: Royal Society of Chemistry journal article supplement (doi:10.1039/b709747f), 2008-01-01
Supplement: b709747f.pdf [file b709747f.pdf]

# Unsymmetrically substituted side-bridged cyclam derivatives and their Cu(II) and Zn(II) complexes

Jan Plutnar, Jana Havlíčková, Jan Kotek,\* Petr Hermann and Ivan Lukeš

## Electronic Supplementary Information

S1 – Numbering scheme of **3** for NMR signals assignment

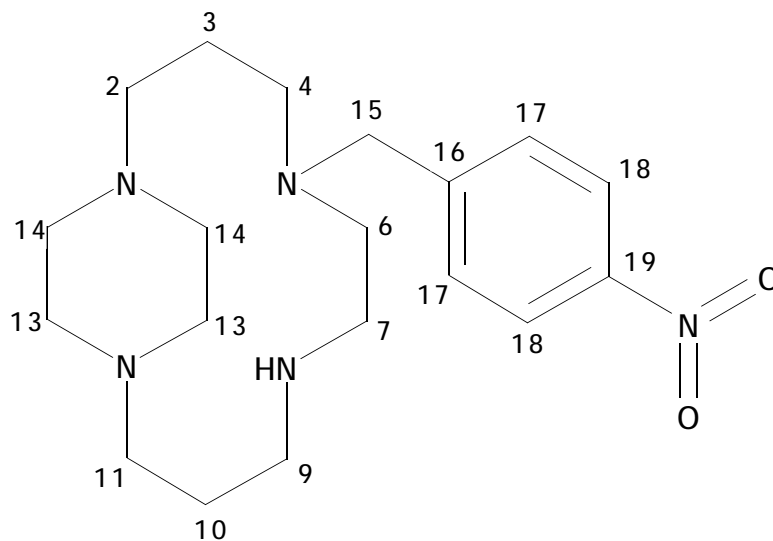

S1a –  $^{13}\text{C}$  and  $^1\text{H}$  NMR signals assignment based on HSQC/HMBC/H-H COSY/NOESY 2D spectra

| Assignment | $^{13}\text{C}$ | $^1\text{H}$ |
|------------|-----------------|--------------|
| 2          | 54.65           | 2.56         |
| 3          | 23.63           | 1.69         |
| 4          | 54.79           | 2.89         |
| 6          | 48.33           | 2.53         |
| 7          | 55.70           | 2.62         |
| 9          | 51.22           | 2.66         |
| 10         | 26.10           | 1.76         |
| 11         | 56.95           | 2.64         |
| 13         | 50.10           | 2.26, 3.02   |
| 14         | 48.09           | 2.58, 3.18   |
| 15         | 57.58           | 3.71         |
| 16         | 147.02          | ---          |
| 17         | 129.70          | 7.45         |
| 18         | 123.29          | 8.18         |
| 19         | 146.89          | ---          |

S2 – Numbering scheme of 4<sup>+</sup> for NMR signals assignment

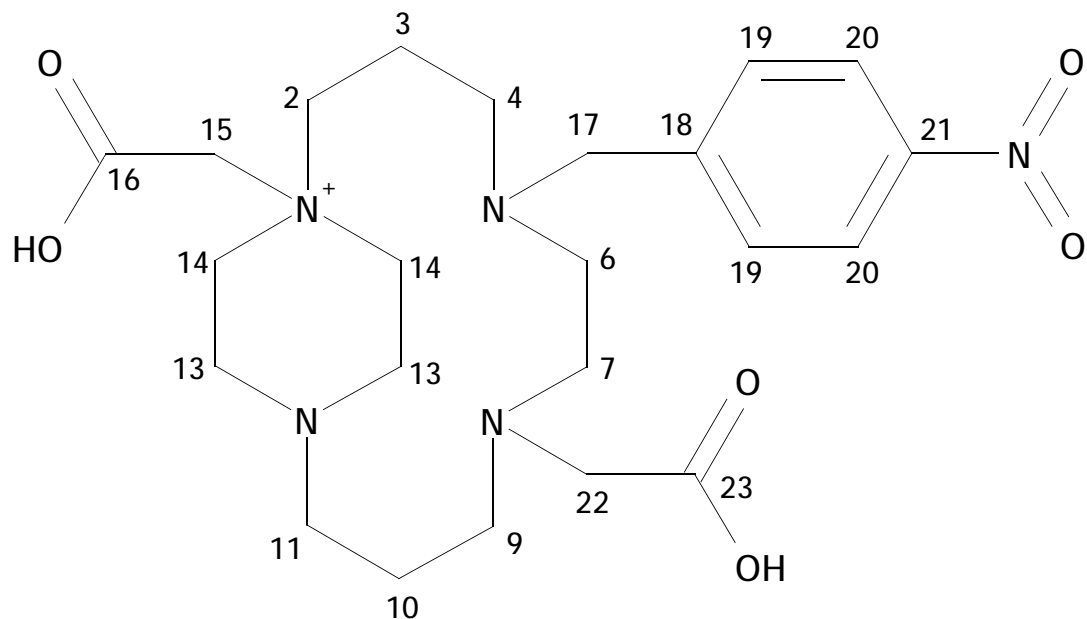

S2a – <sup>13</sup>C and <sup>1</sup>H NMR signals assignment based on HSQC/HMBC 2D spectra

| Assignment | <sup>13</sup> C | <sup>1</sup> H |
|------------|-----------------|----------------|
| 2          | 56.64           | 4.15           |
| 3          | 20.04           | 2.40           |
| 4          | 52.26           | 3.33           |
| 6          | 52.74           | 3.38           |
| 7          | 54.24           | 3.36           |
| 9          | 56.14           | 3.25           |
| 10         | 22.02           | 2.26           |
| 11         | 55.13           | 3.63           |
| 13         | 45.88           | 3.90           |
| 14         | 56.34           | 4.27           |
| 15         | 63.17           | 4.46           |
| 16         | 168.46          | ---            |
| 17         | 58.86           | 4.44           |
| 18         | 139.45          | ---            |
| 19         | 134.94          | 7.73           |
| 20         | 126.60          | 8.33           |
| 21         | 150.67          | ---            |
| 22         | 57.20           | 3.78           |
| 23         | 176.50          | ---            |

S3 –  $^1\text{H}$ - $^1\text{H}$ -COSY spectra of **3** in  $\text{CDCl}_3$

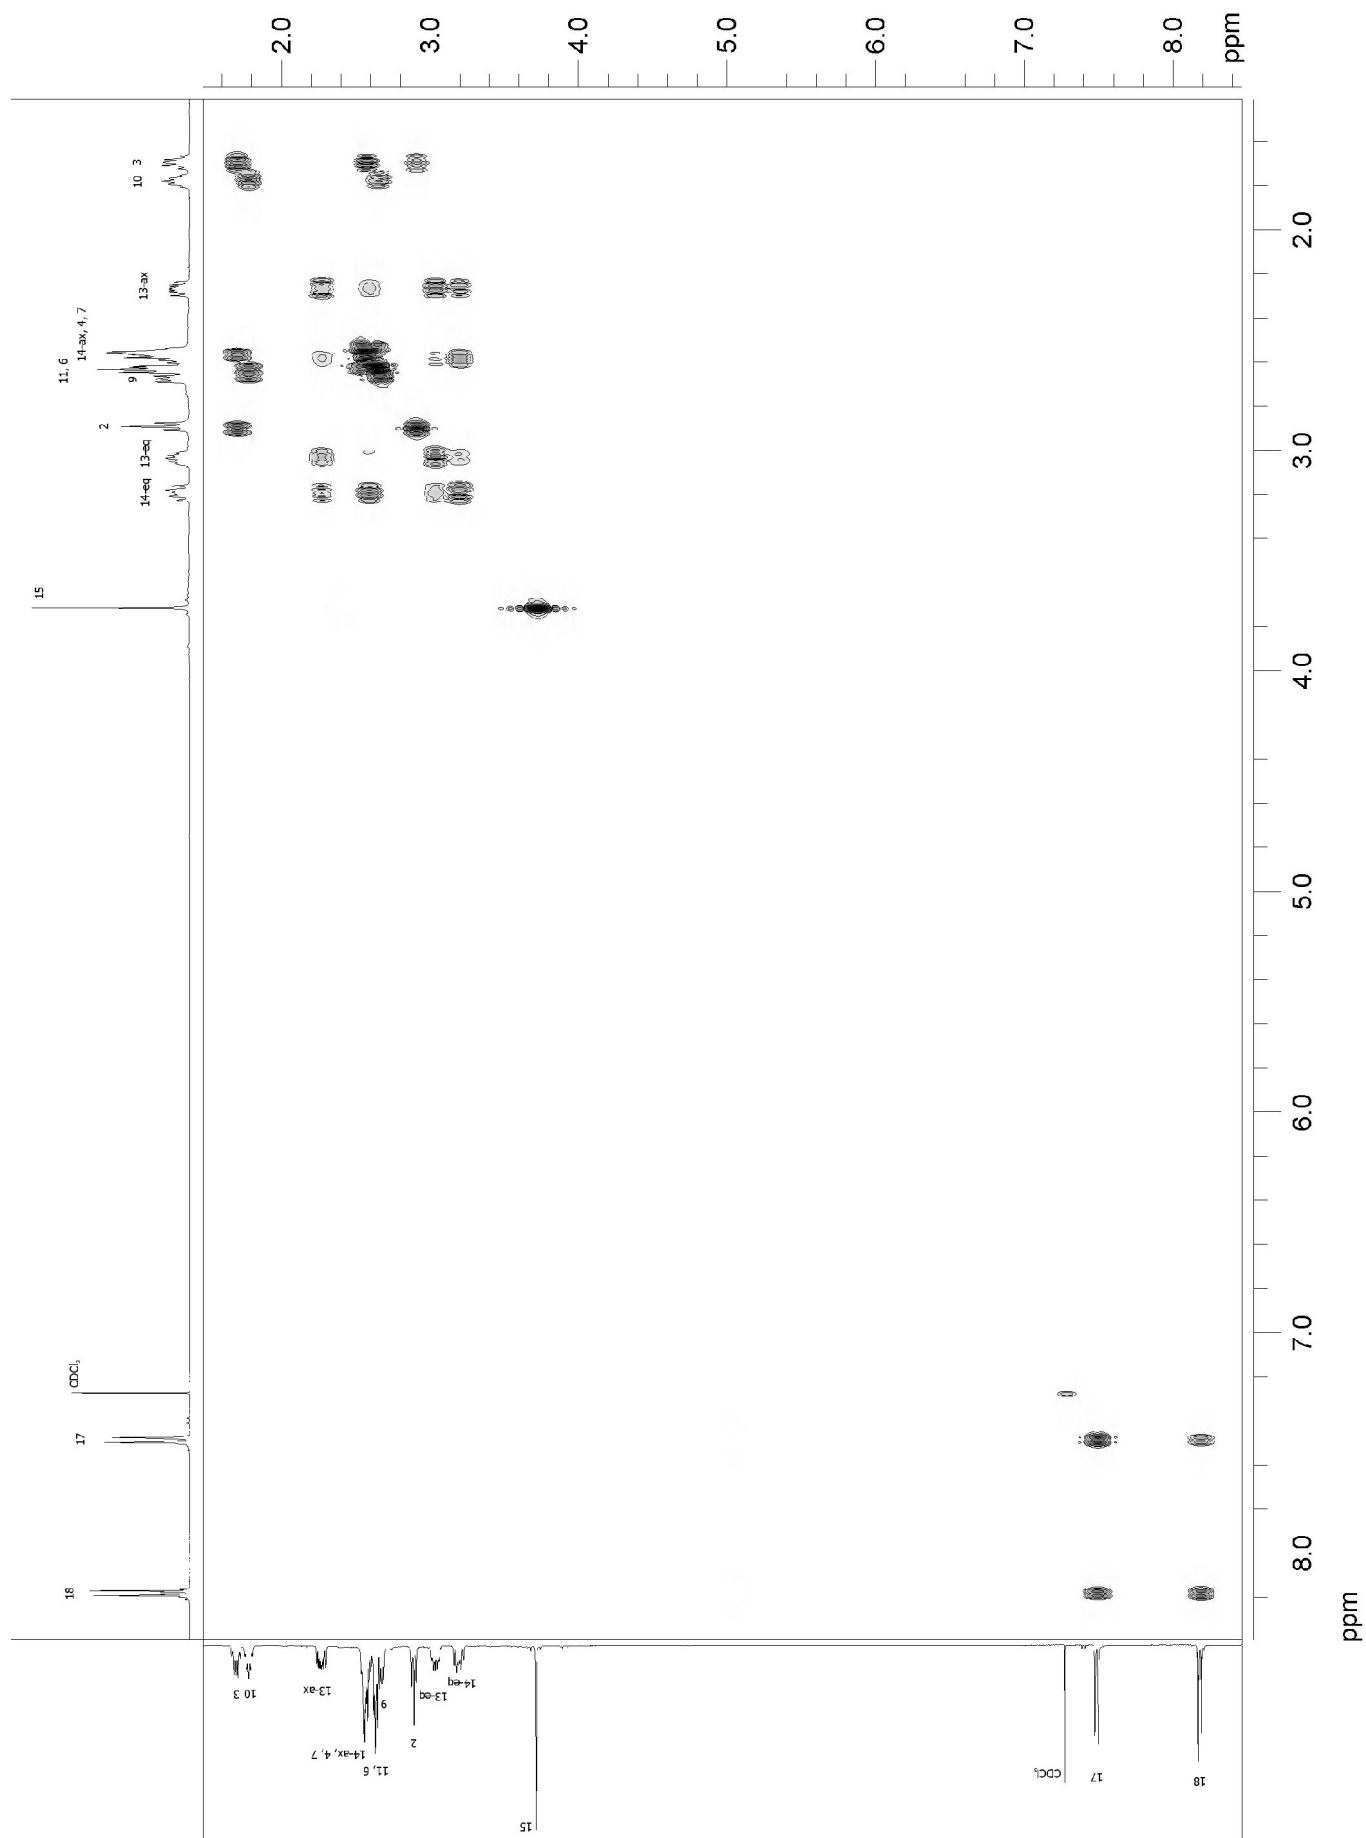

Fig.S4 – Detail of aliphatic region in  $^1\text{H}$ - $^1\text{H}$  COSY spectra of **3** in  $\text{CDCl}_3$

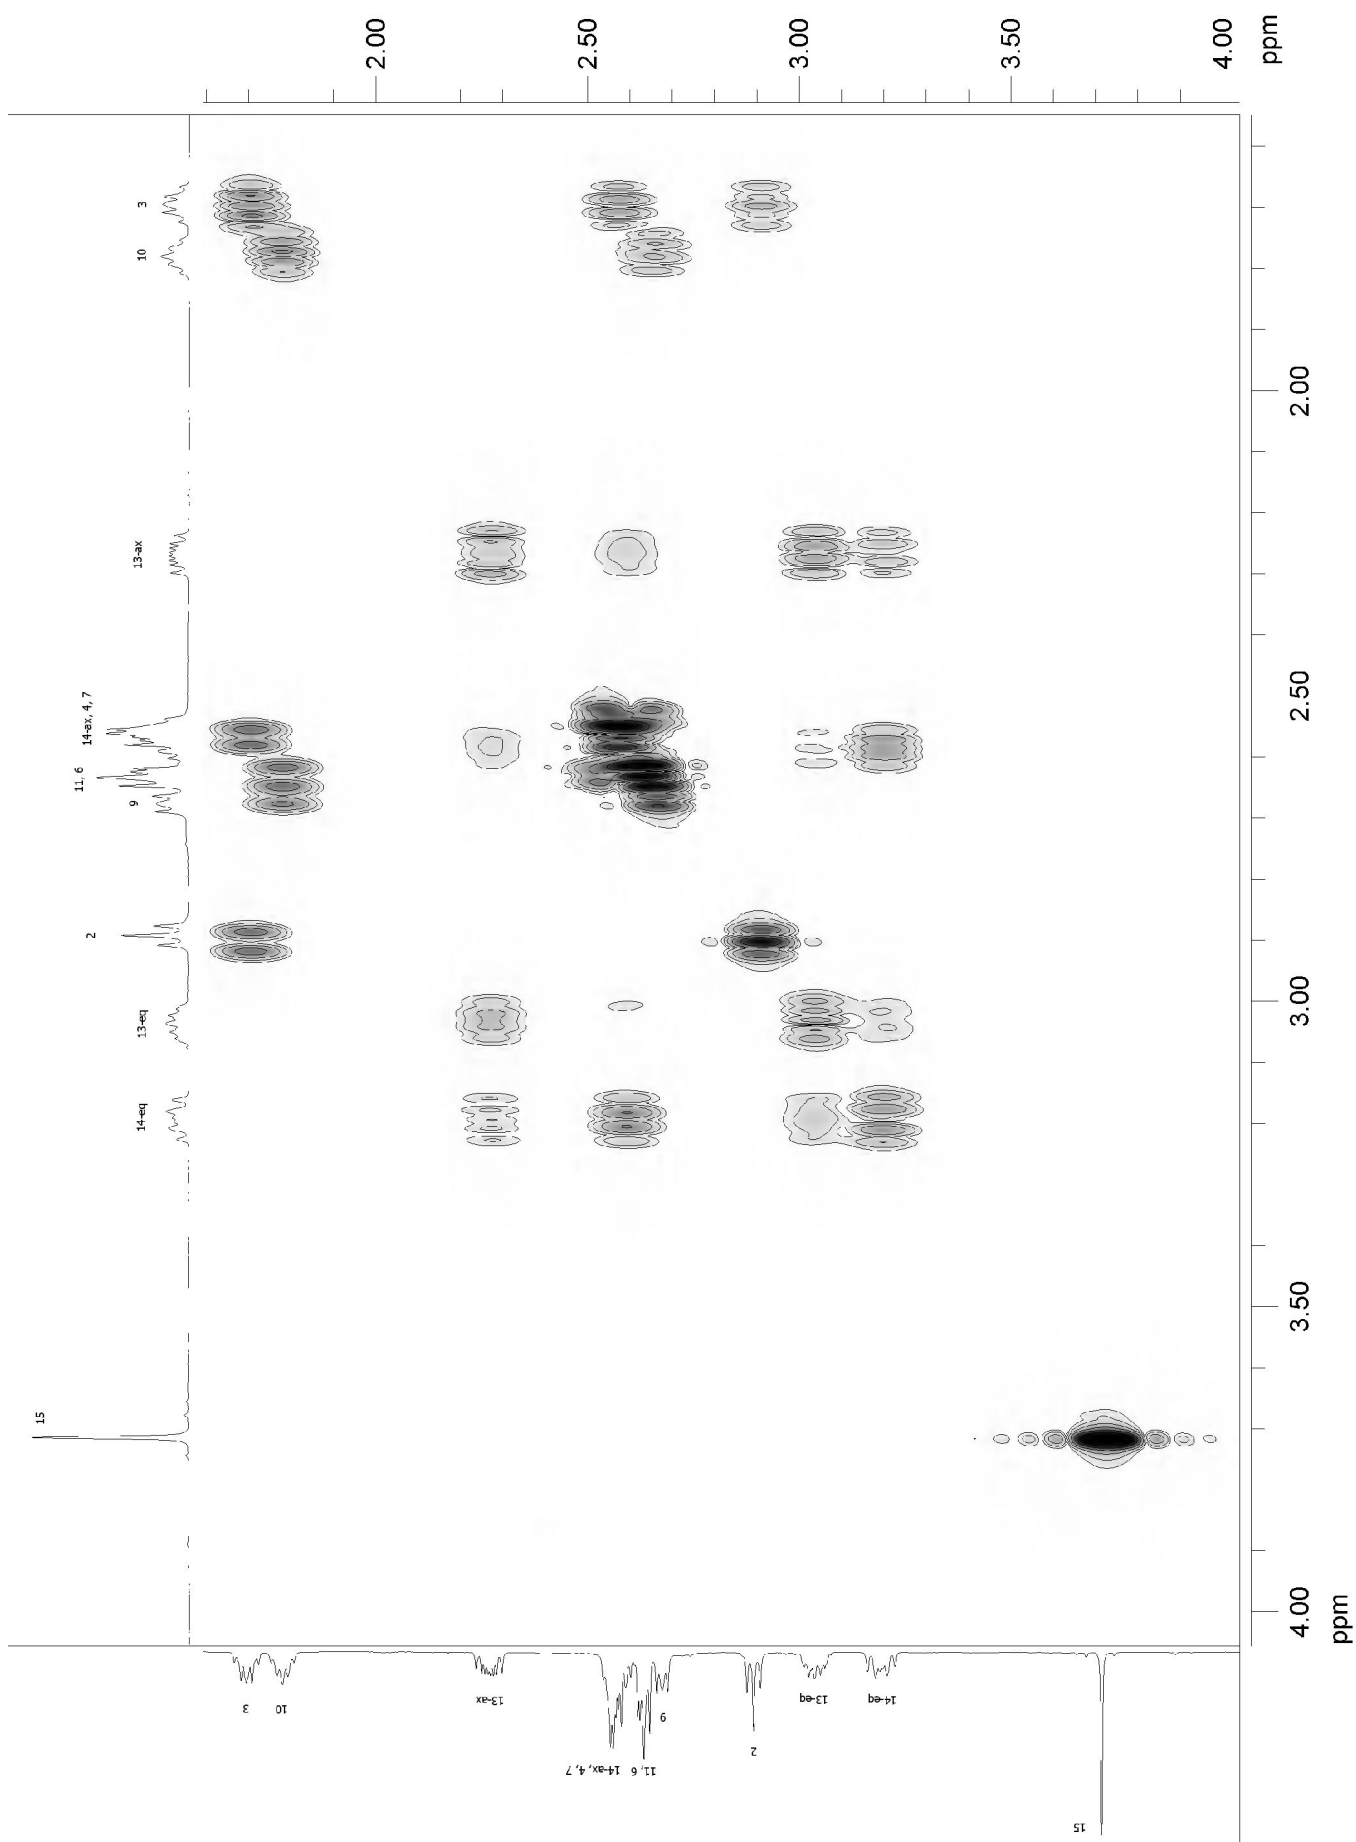

S5 –  $^1\text{H}$ - $^{13}\text{C}$  gHSQC spectra of **3** in  $\text{CDCl}_3$

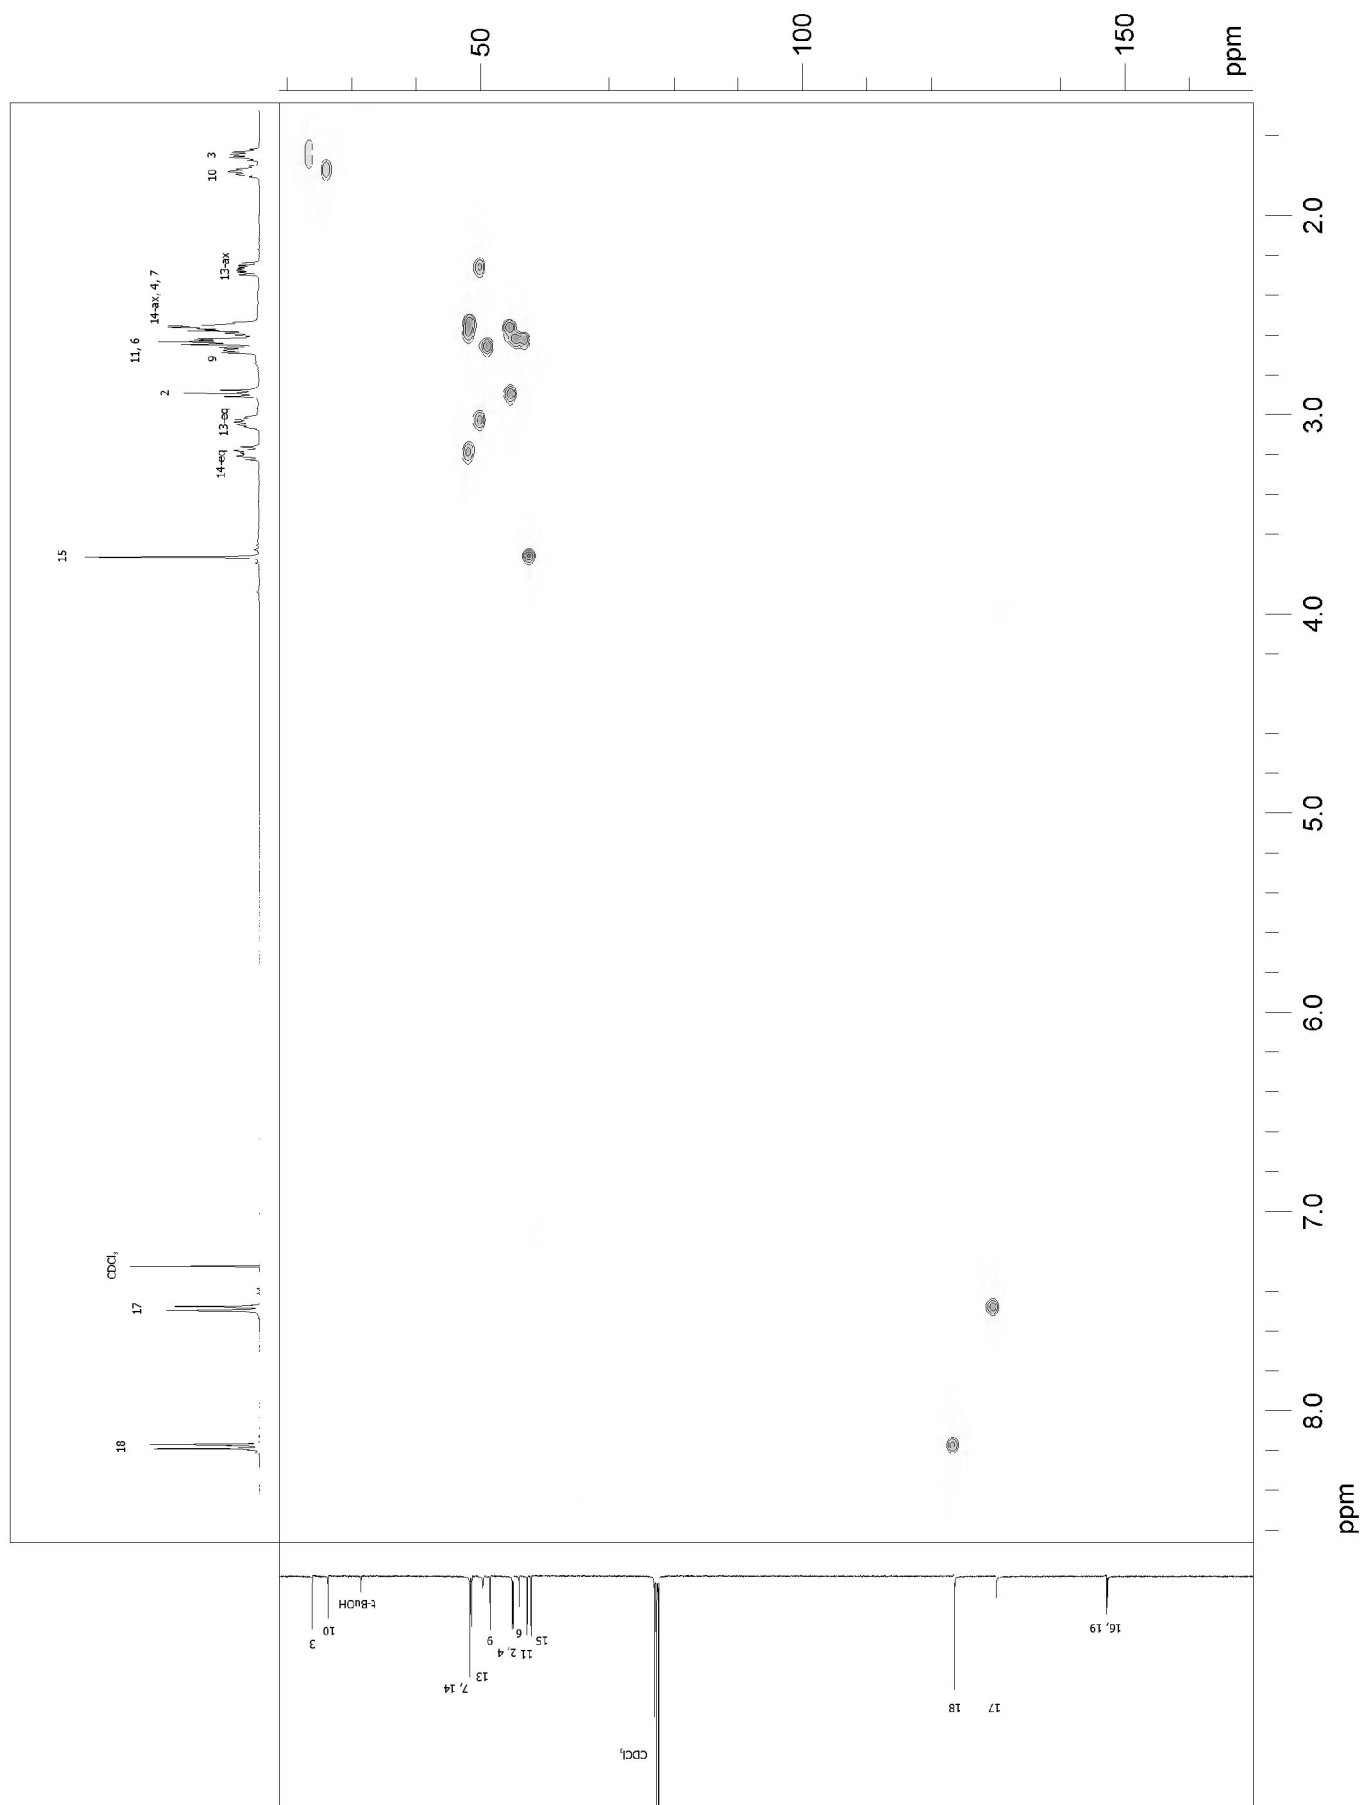

S6 – Detail of aliphatic region in  $^1\text{H}$ - $^{13}\text{C}$  gHSQC spectra of **3** in  $\text{CDCl}_3$

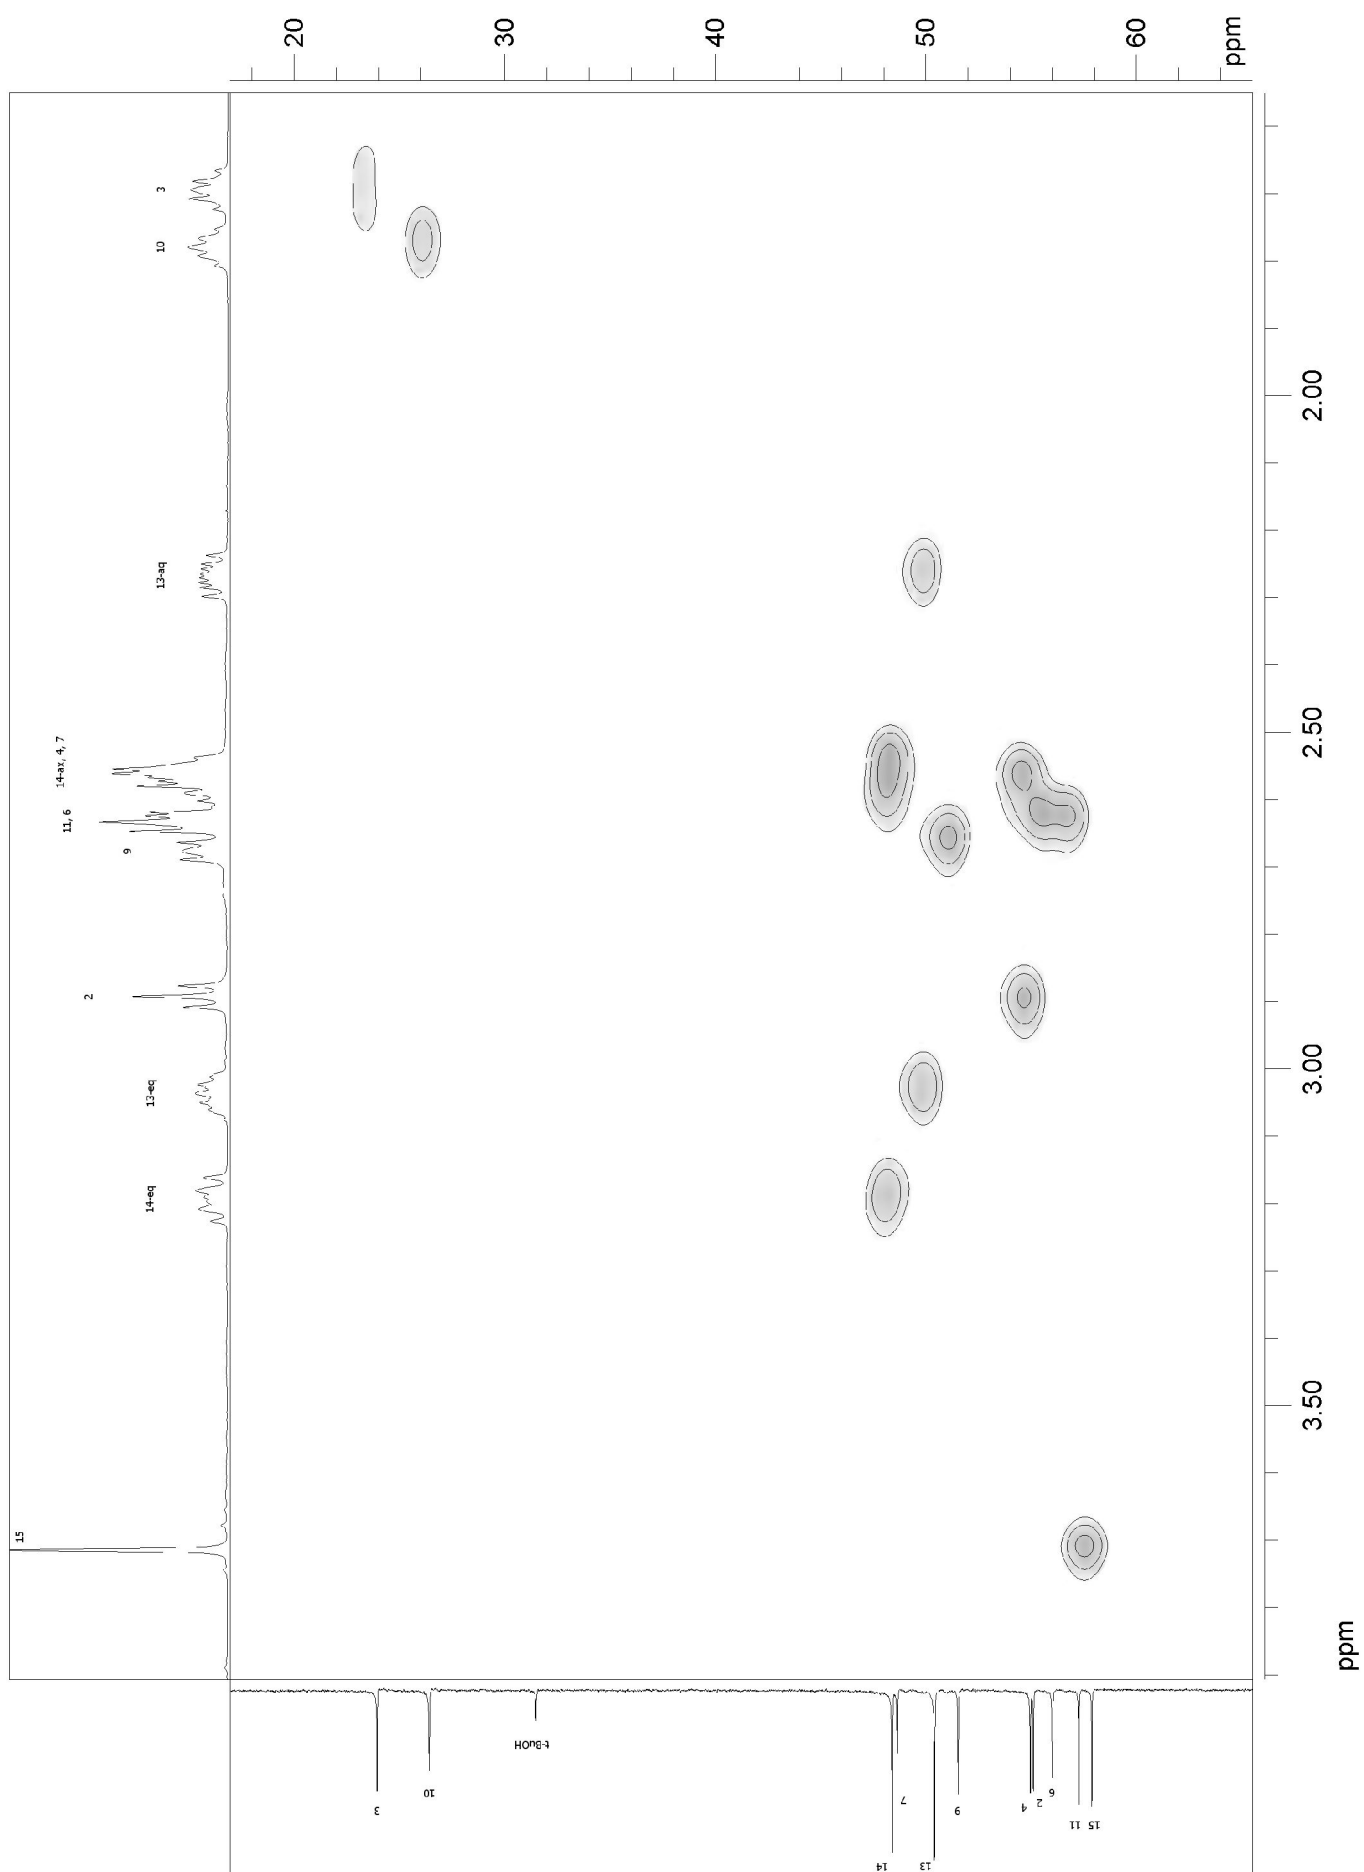

S7 – gHMBC spectra of **3** in CDCl<sub>3</sub>

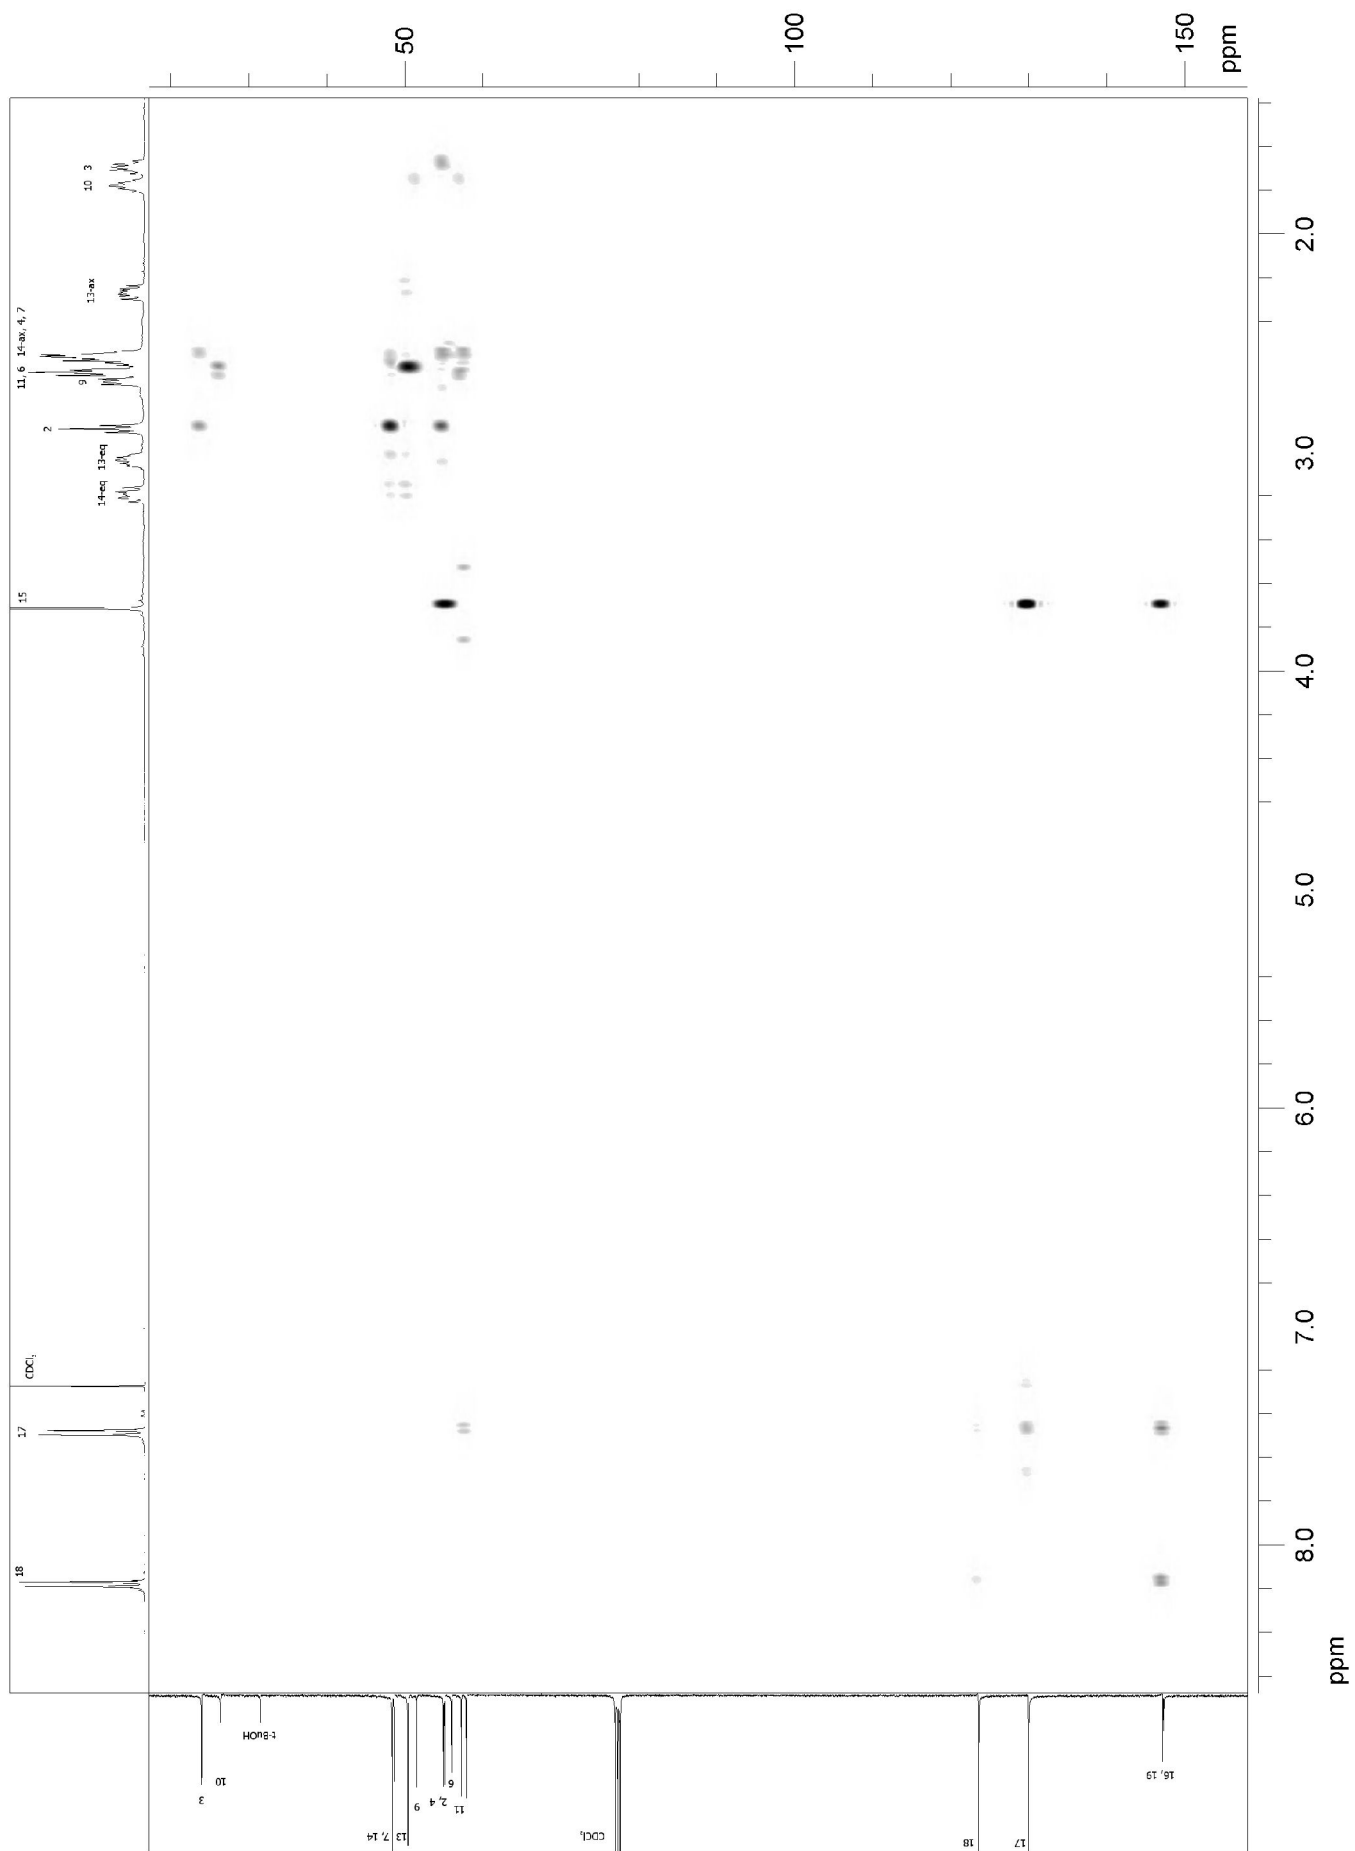

S8 – Detail of aliphatic region in gHMBC of **3** in CDCl<sub>3</sub>

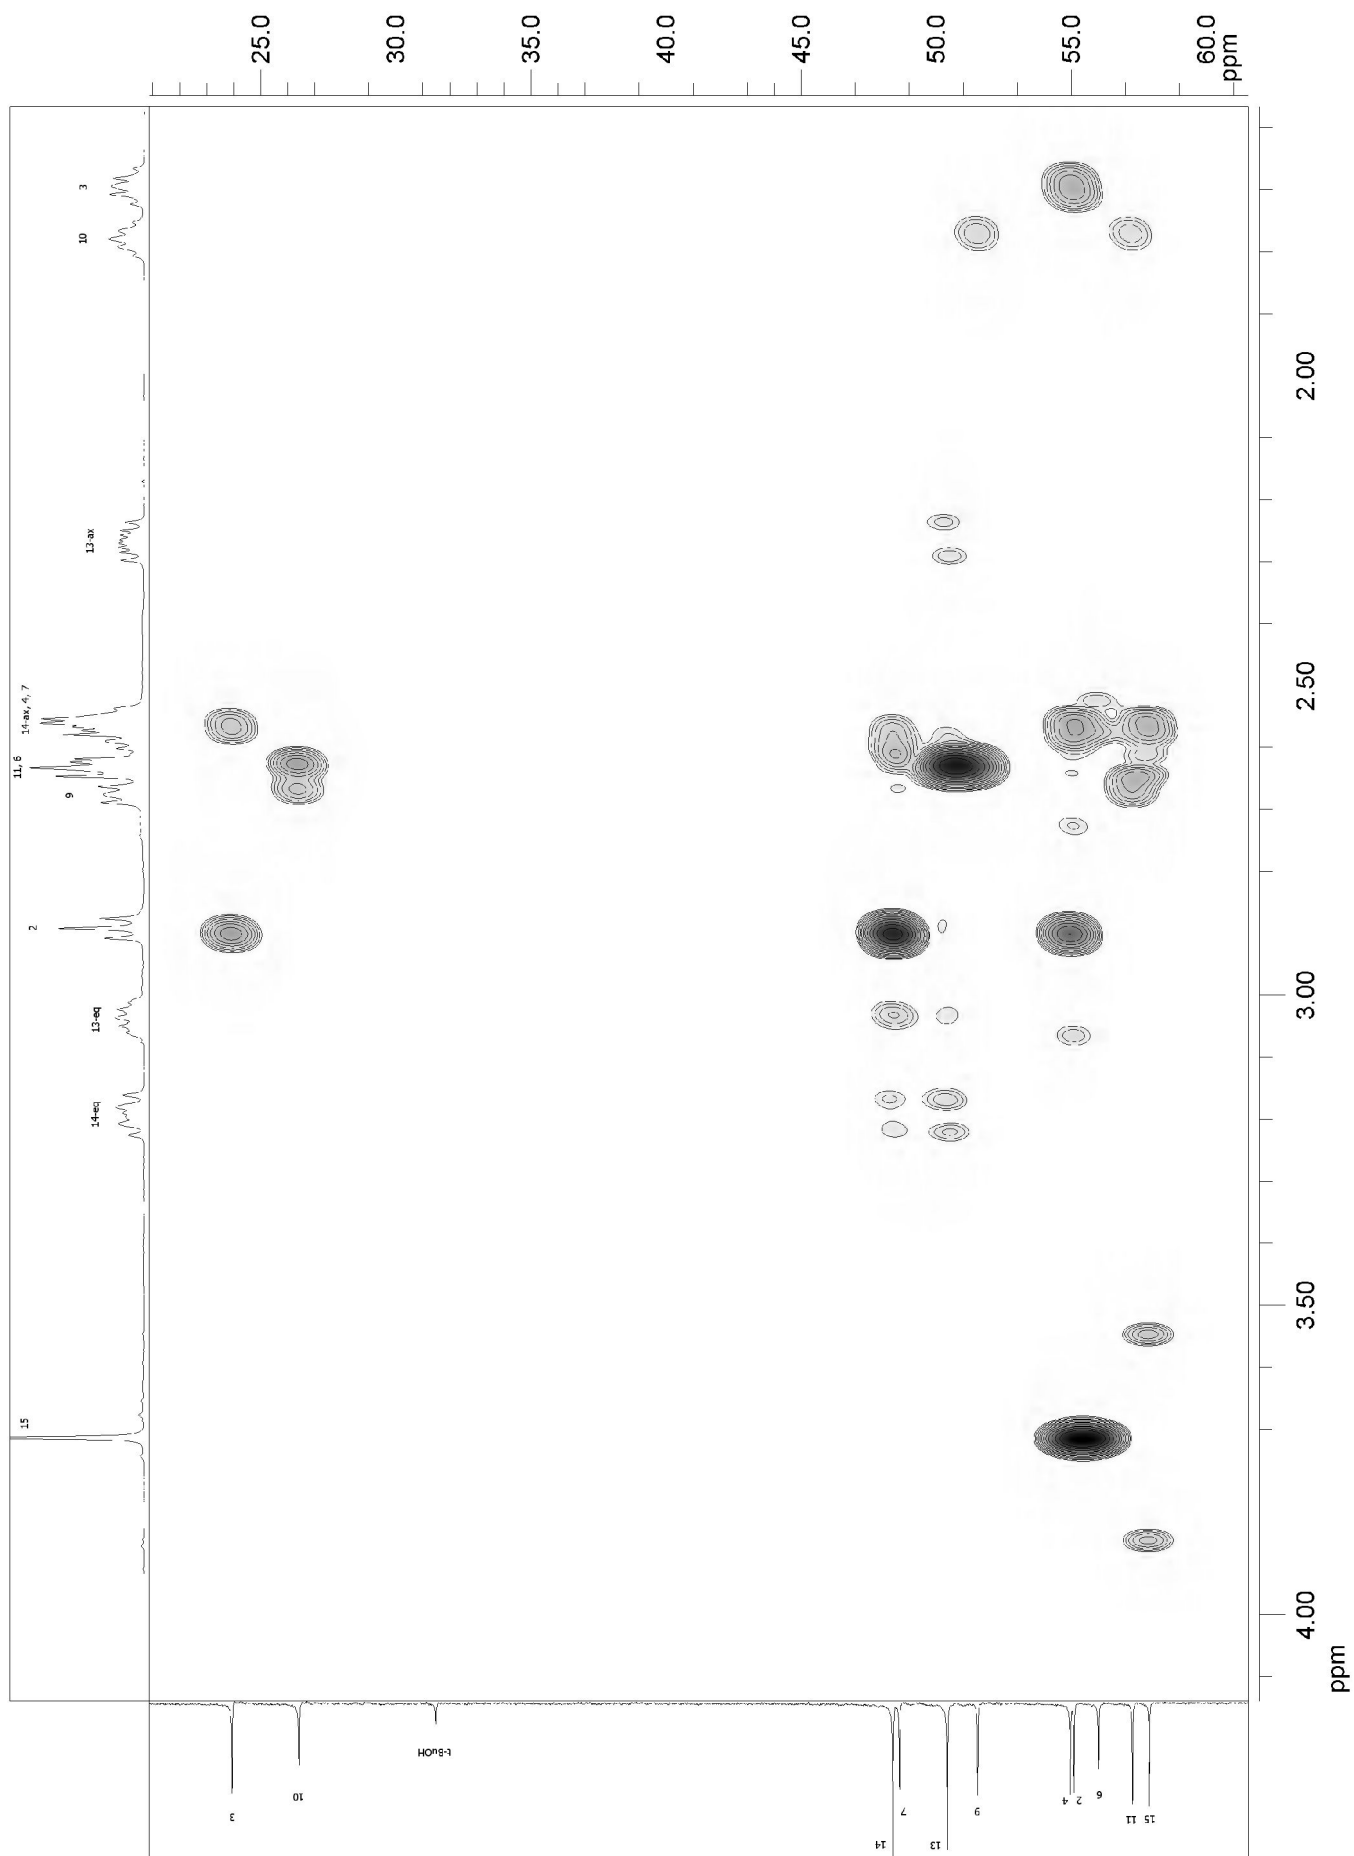



S9 –  $^1\text{H}$ - $^1\text{H}$  NOESY spectra of **3** in  $\text{CDCl}_3$

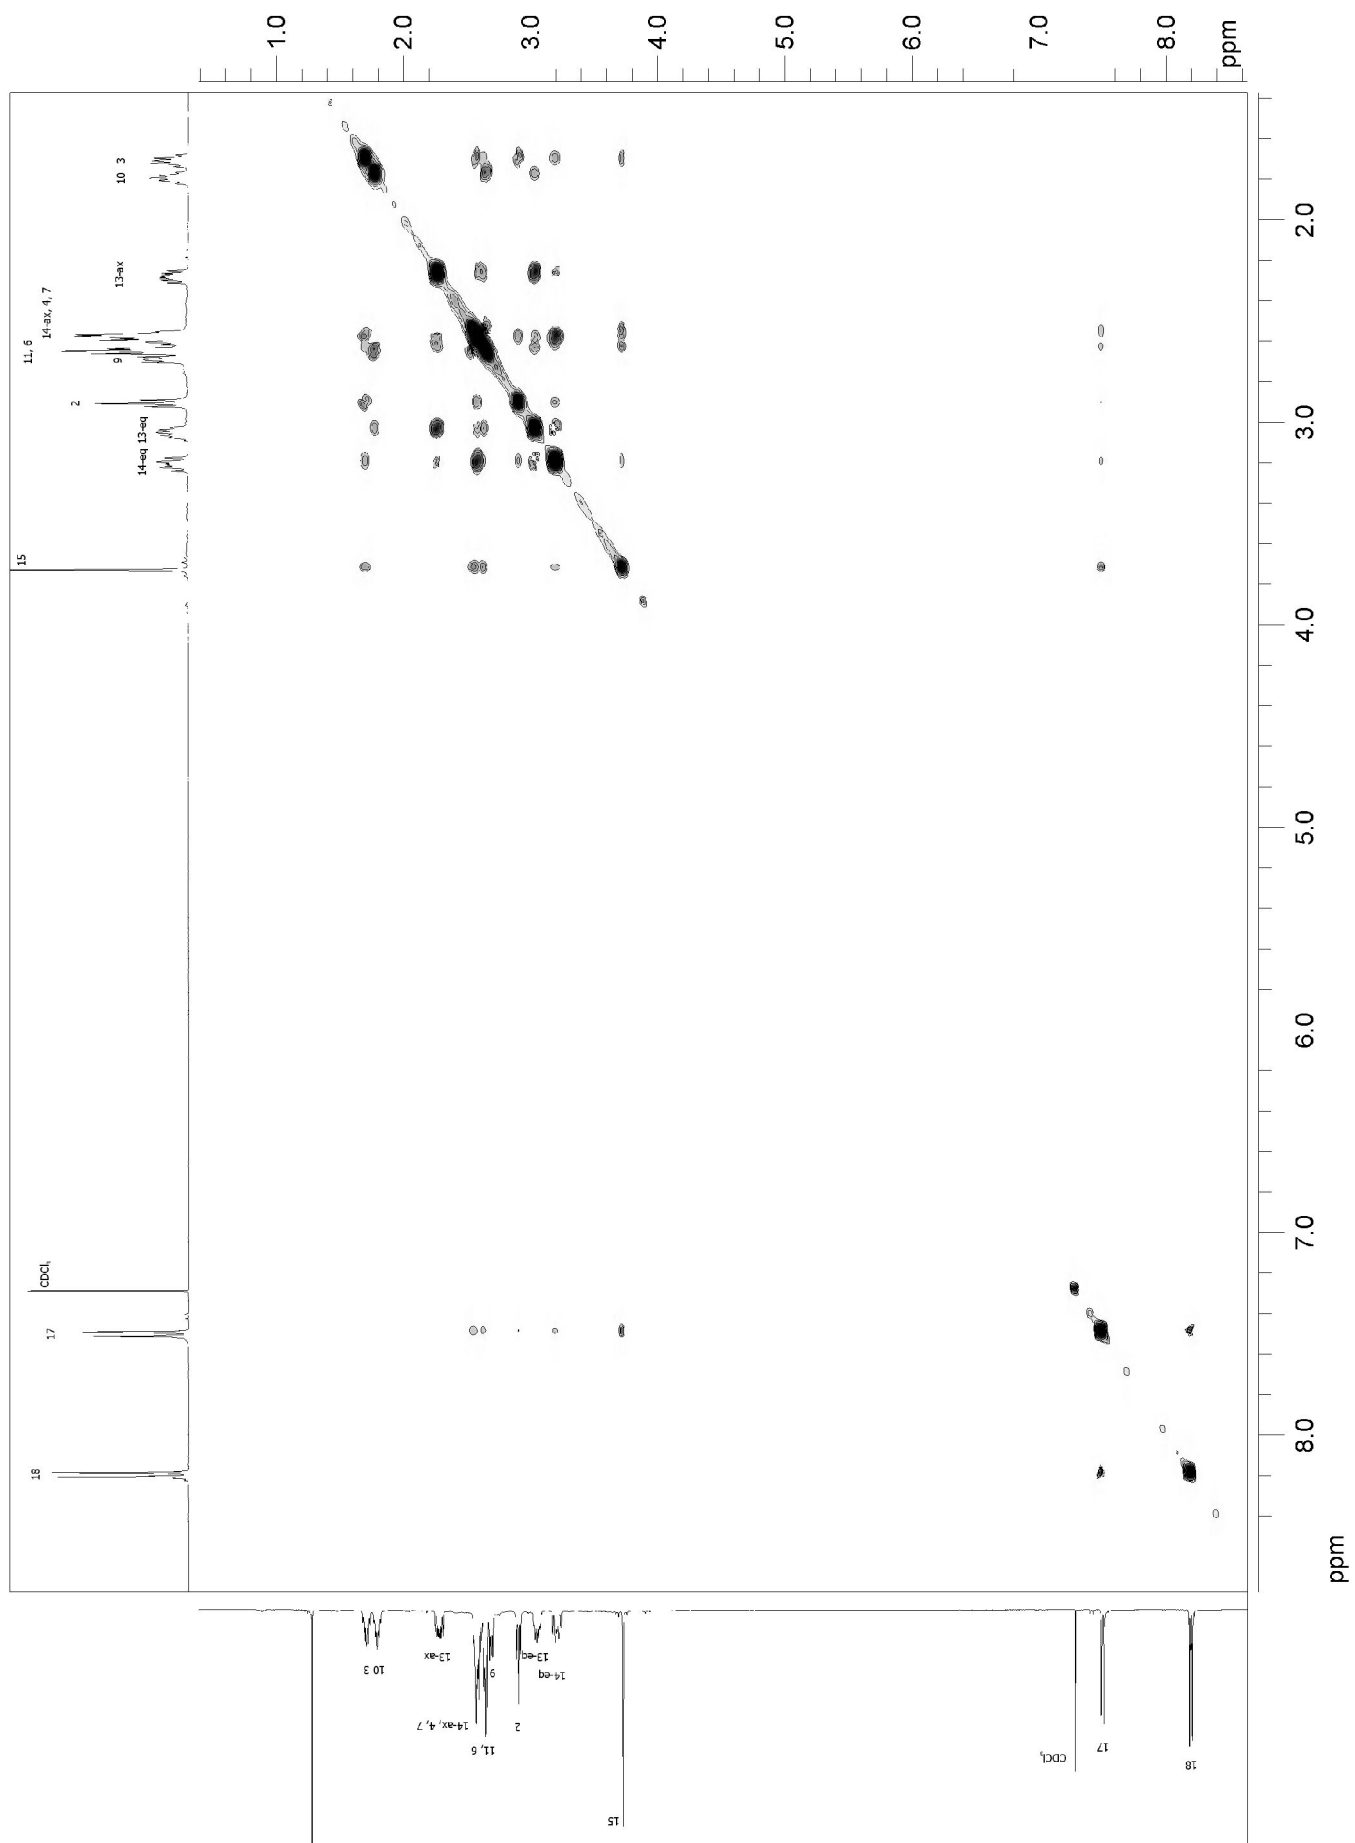

S10 – Detail of aliphatic region in  $^1\text{H}$ - $^1\text{H}$  NOESY spectra of **3** in  $\text{CDCl}_3$

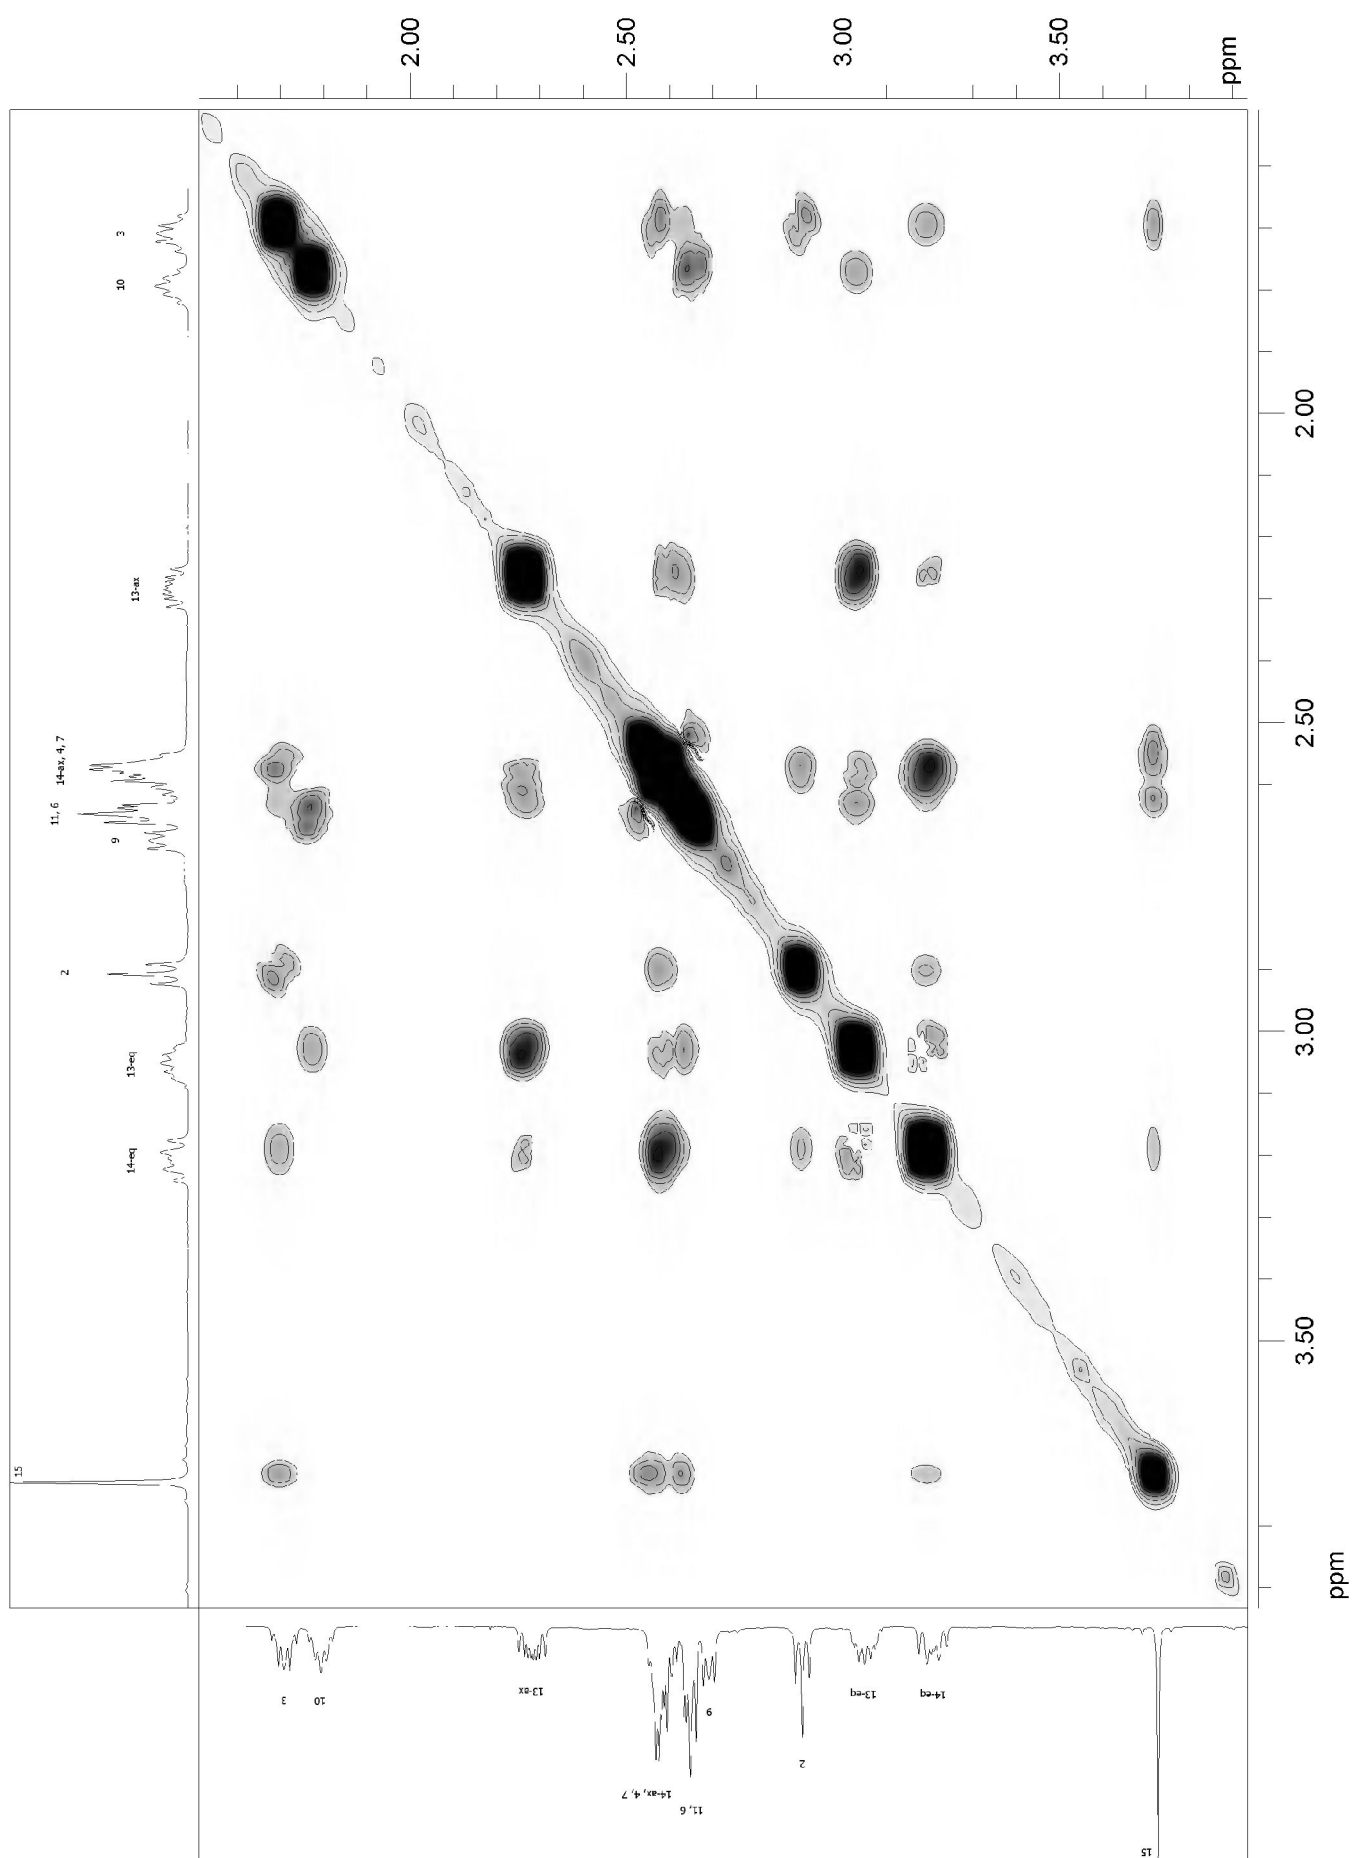

S11 -  $^1\text{H}$ - $^{13}\text{C}$  gHSQC spectra of **4** in  $\text{D}_2\text{O}$

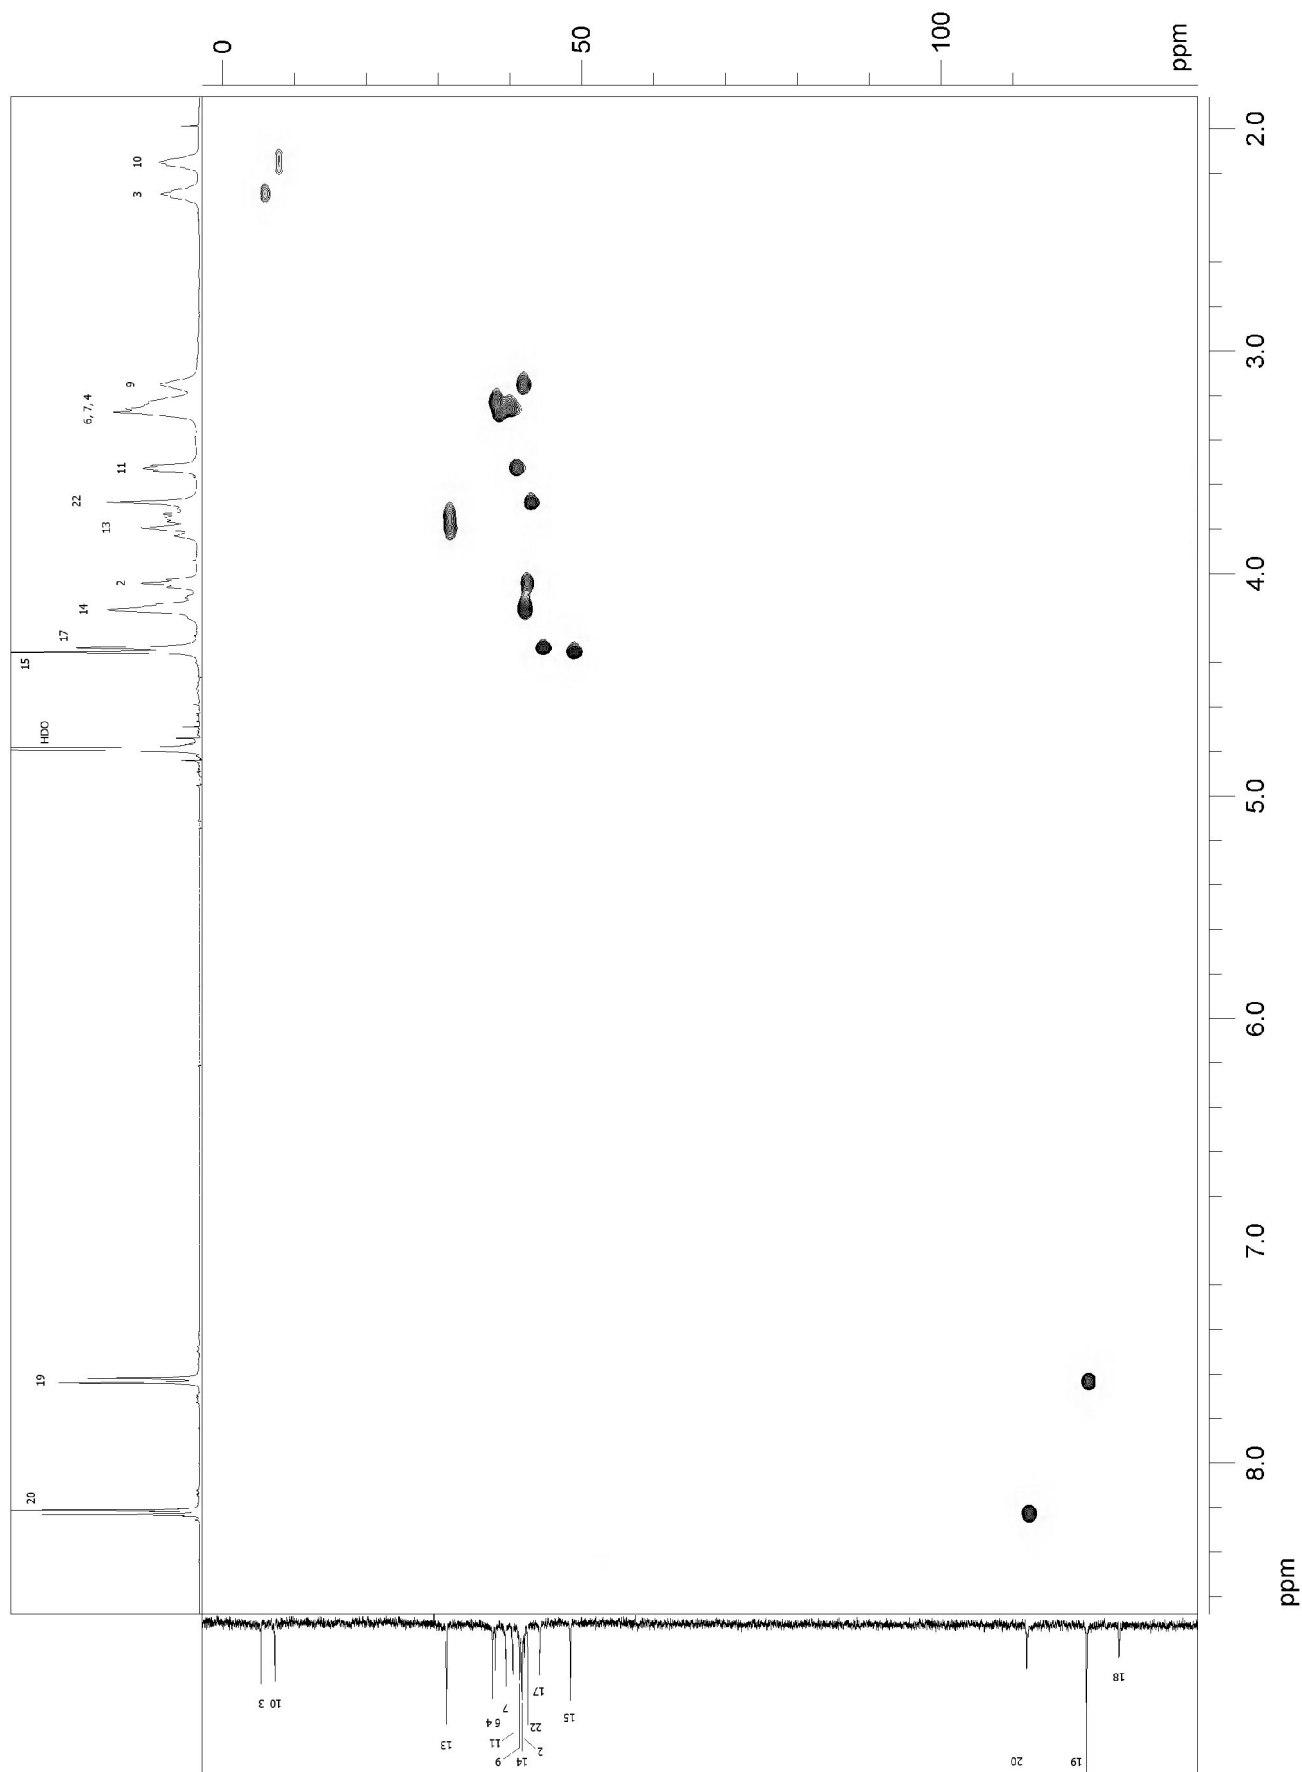

S12 – Detail of aliphatic region in  $^1\text{H}$ - $^{13}\text{C}$  gHSQC spectra of **4** in  $\text{D}_2\text{O}$

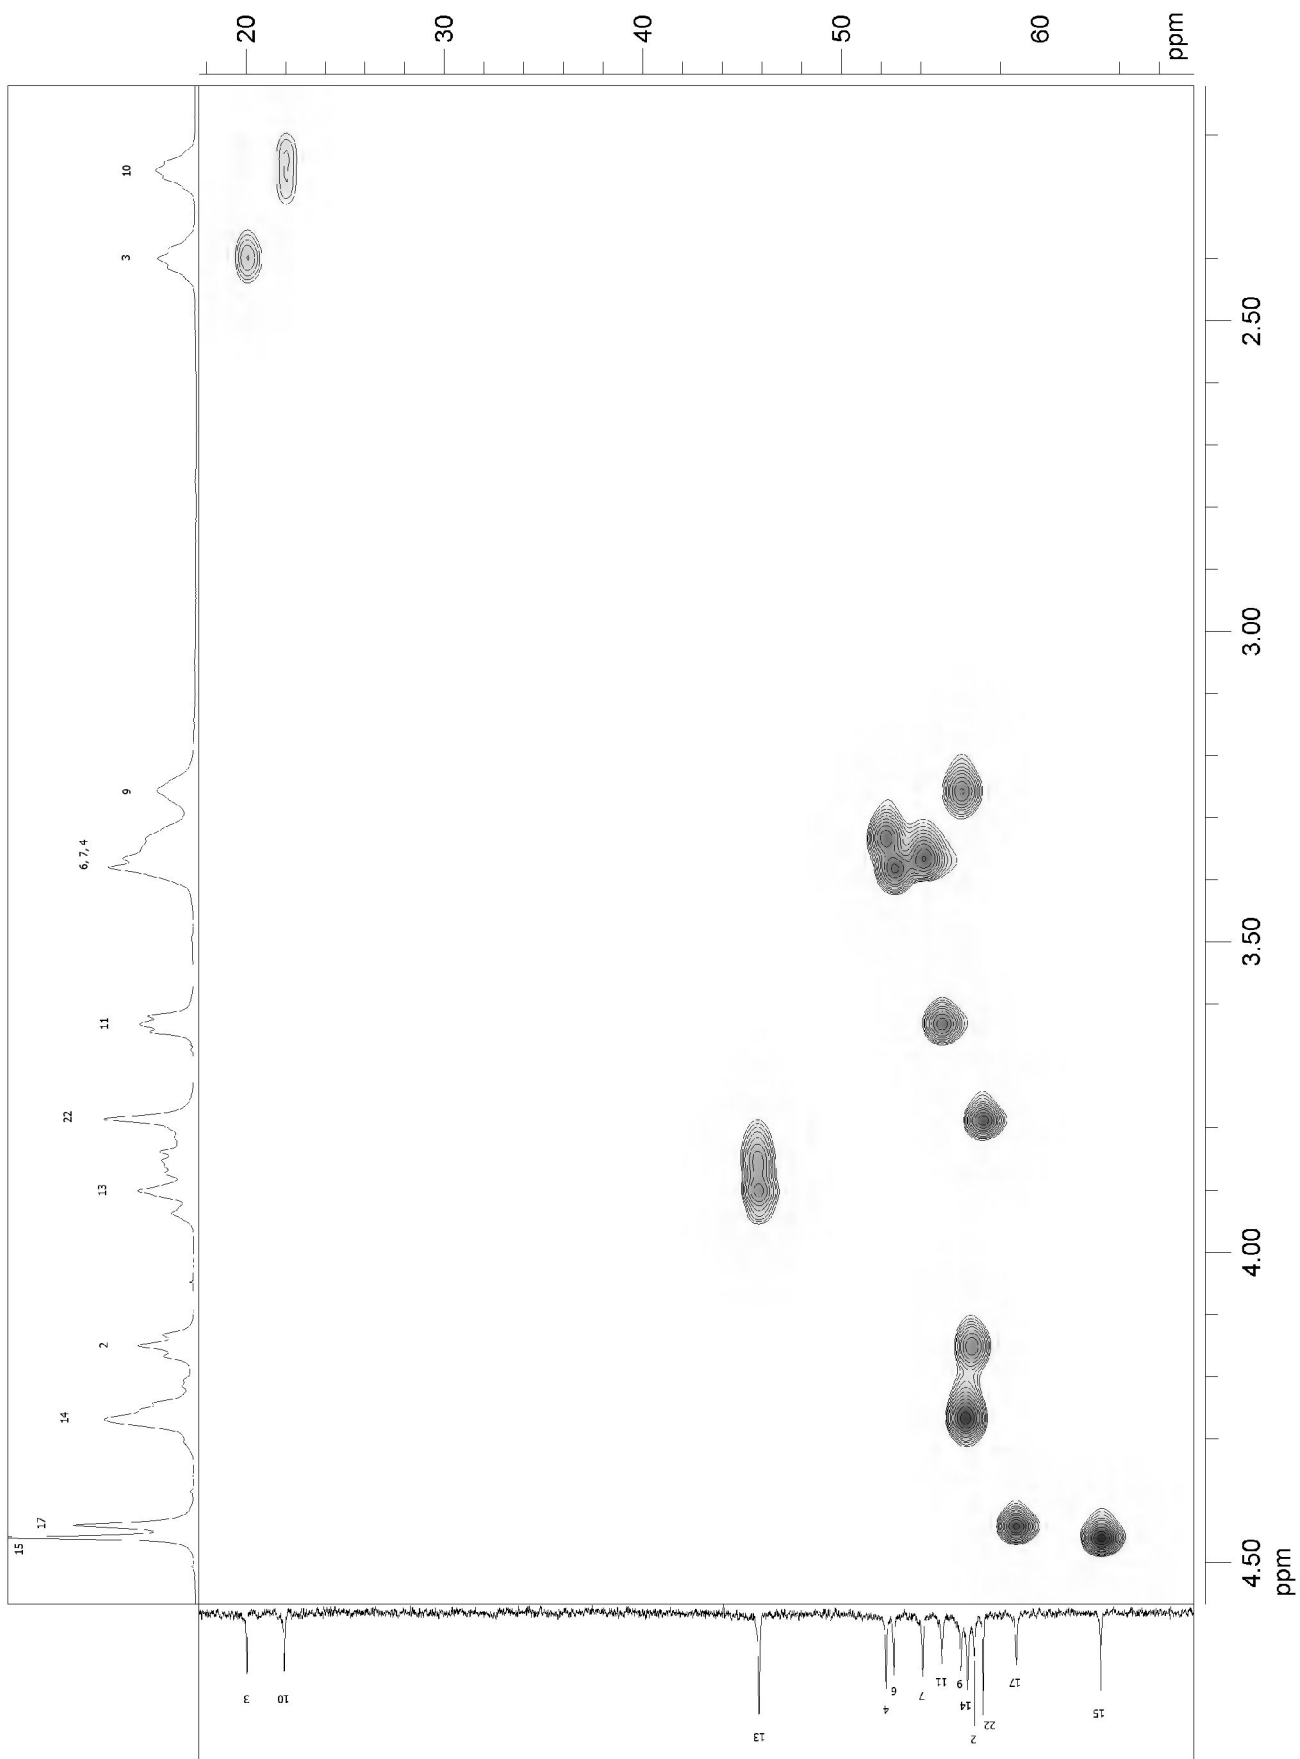

S13 – gHMBC spectra of 4 in D<sub>2</sub>O

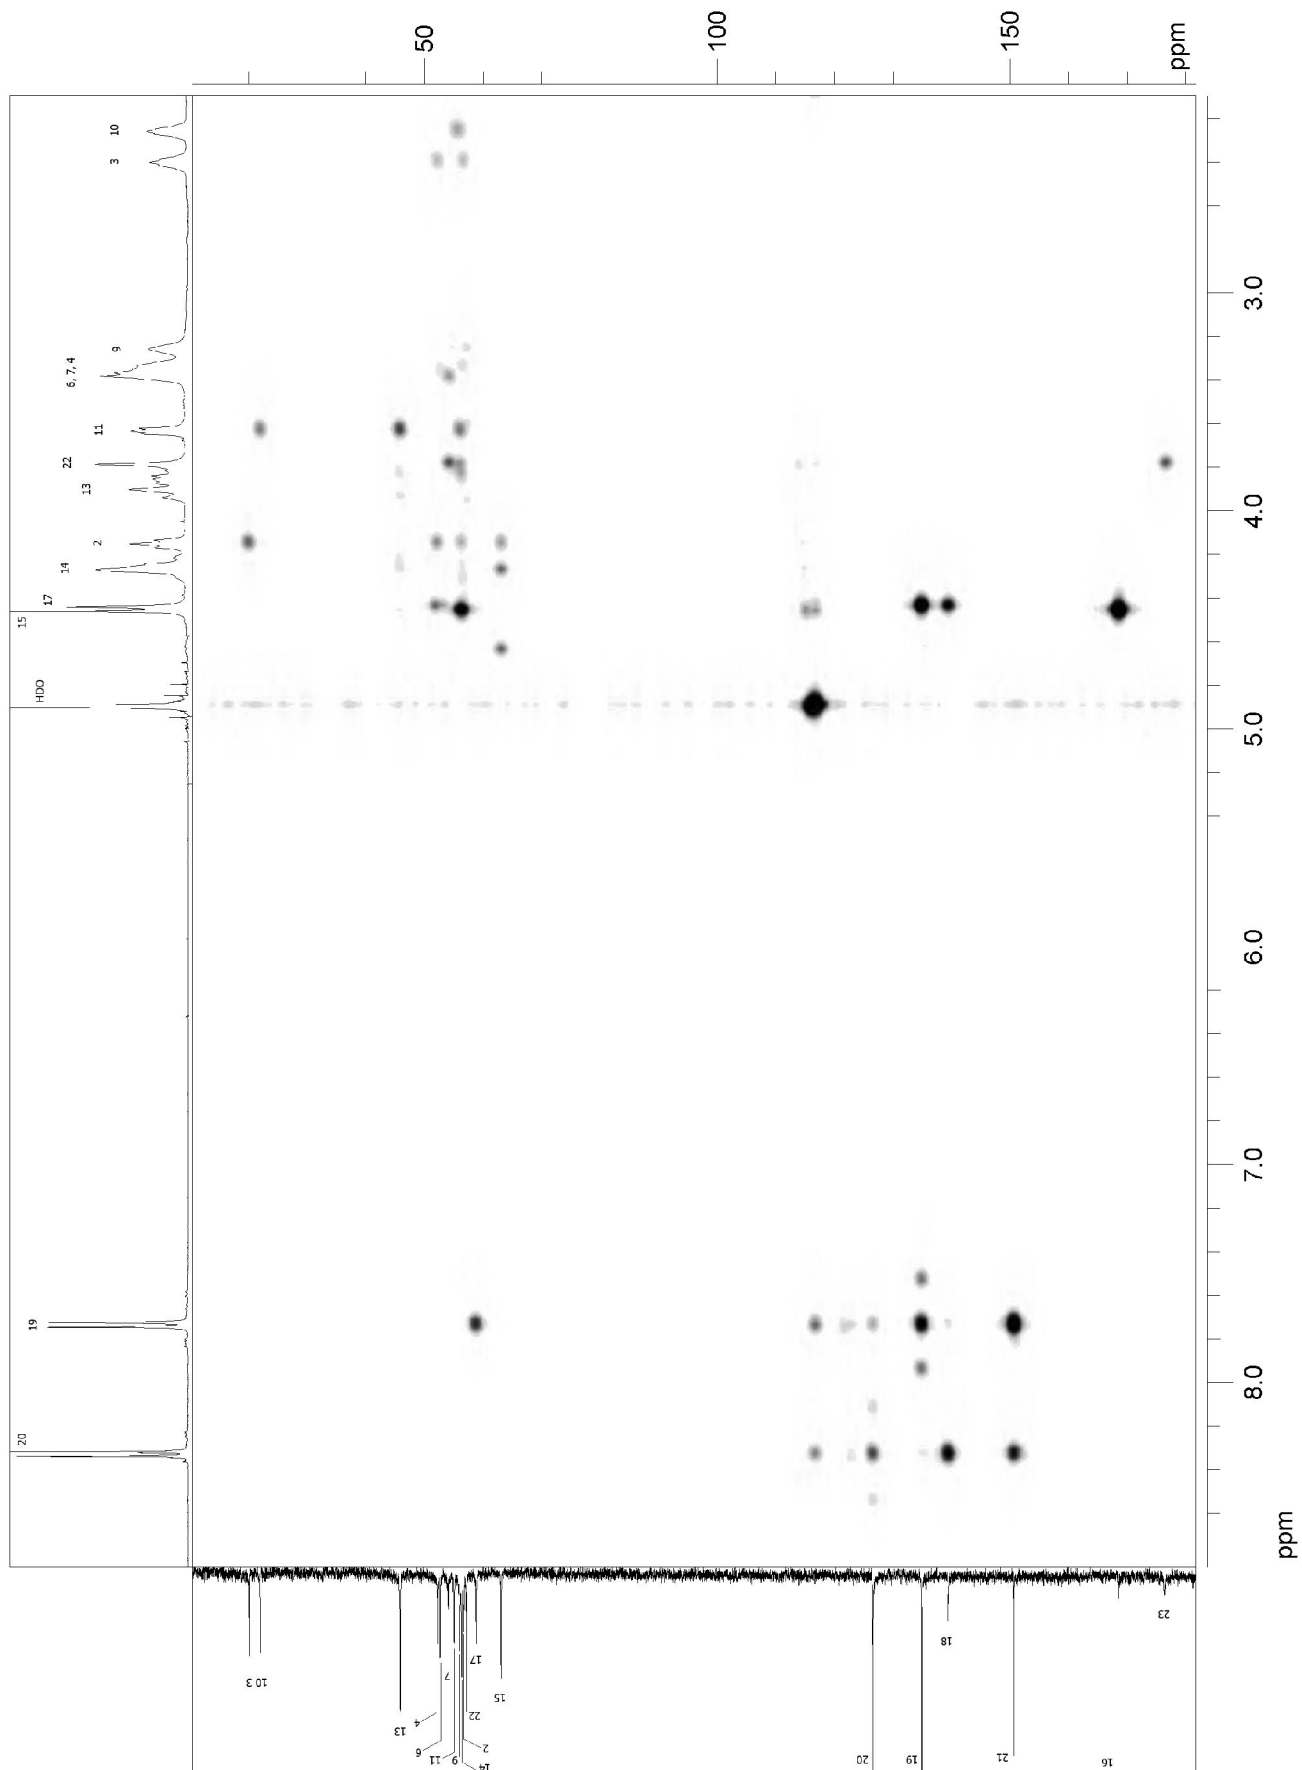

S14 – Detail of aromatic region in gHMBC spectra of **4** in D<sub>2</sub>O

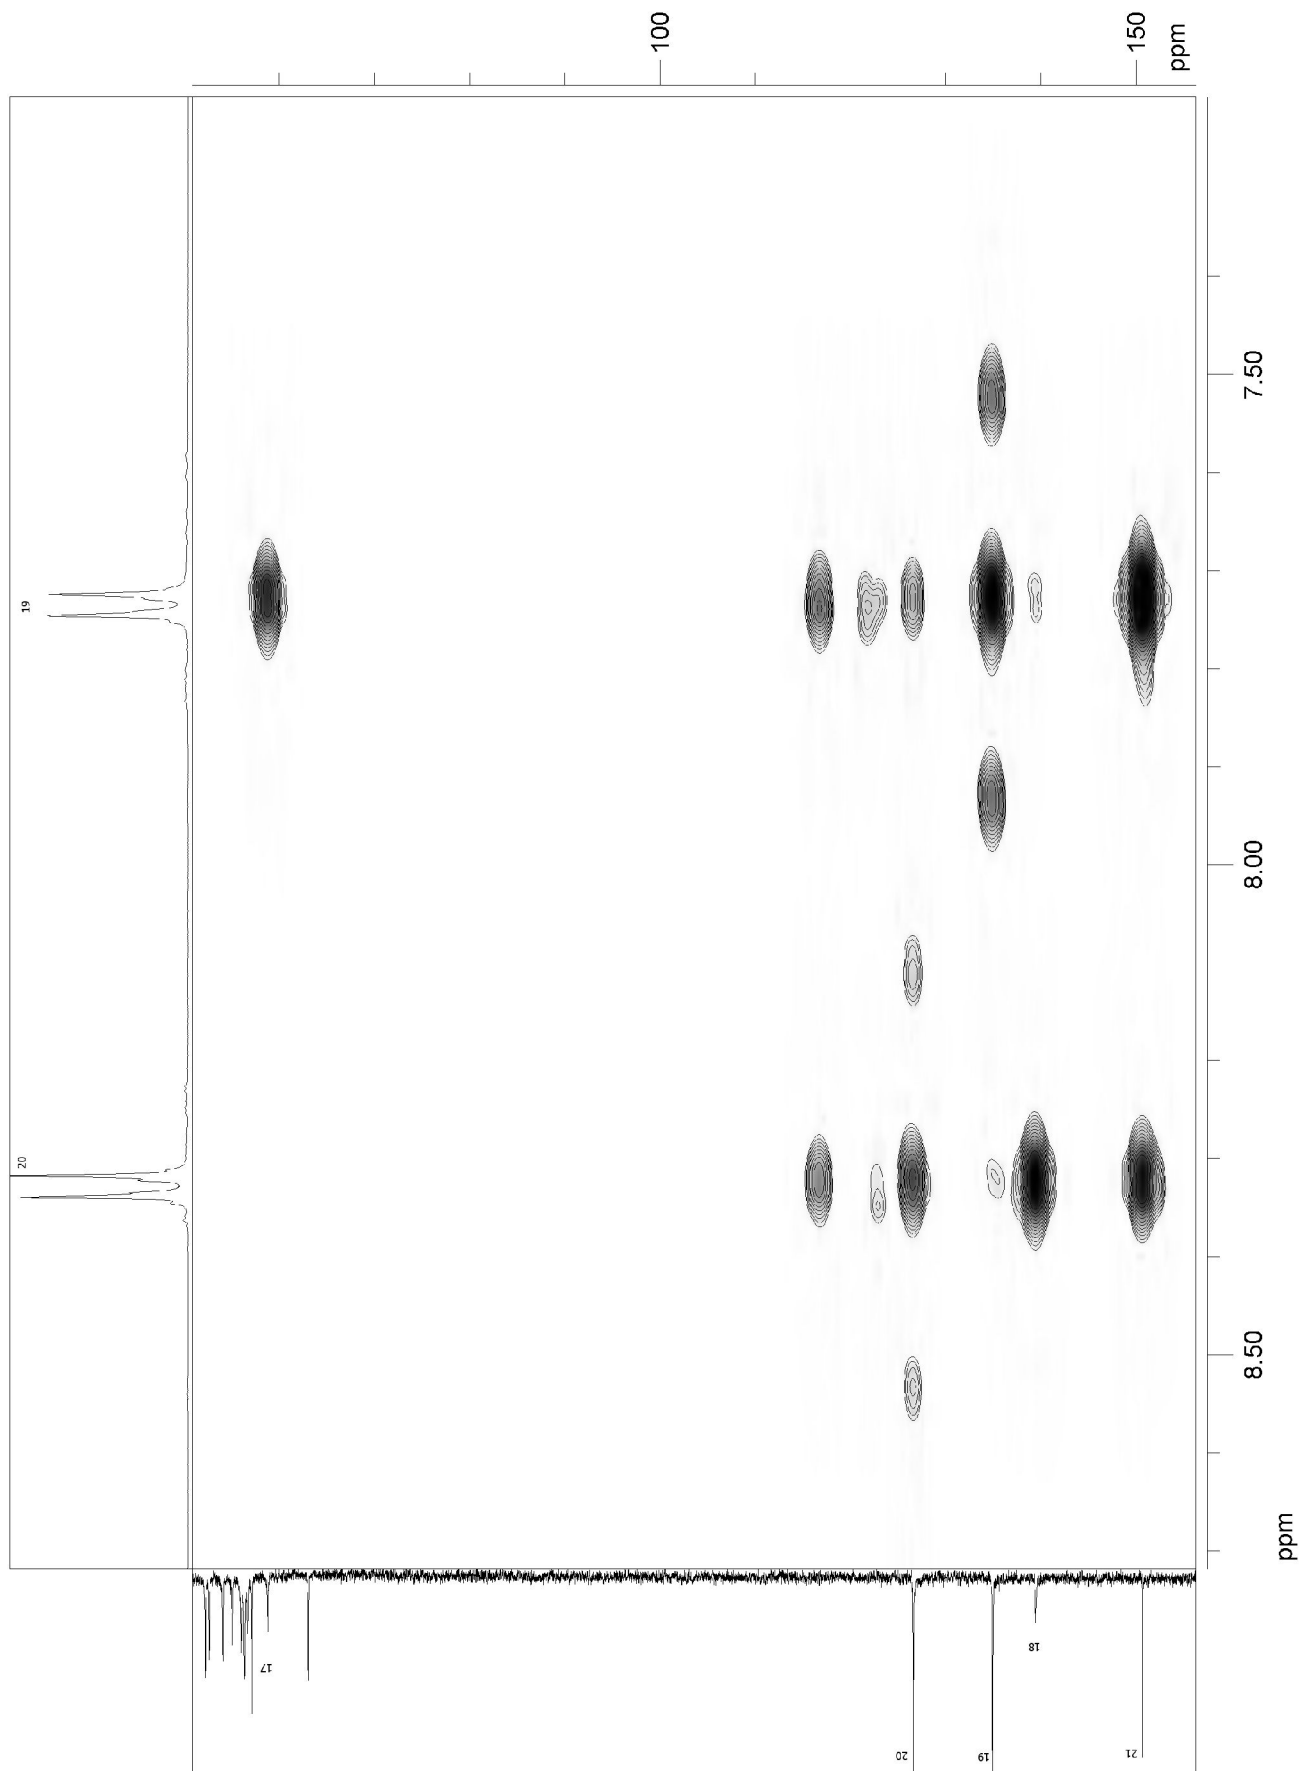

S15 – Detail of aliphatic region in gHMBC spectra of **4** in D<sub>2</sub>O

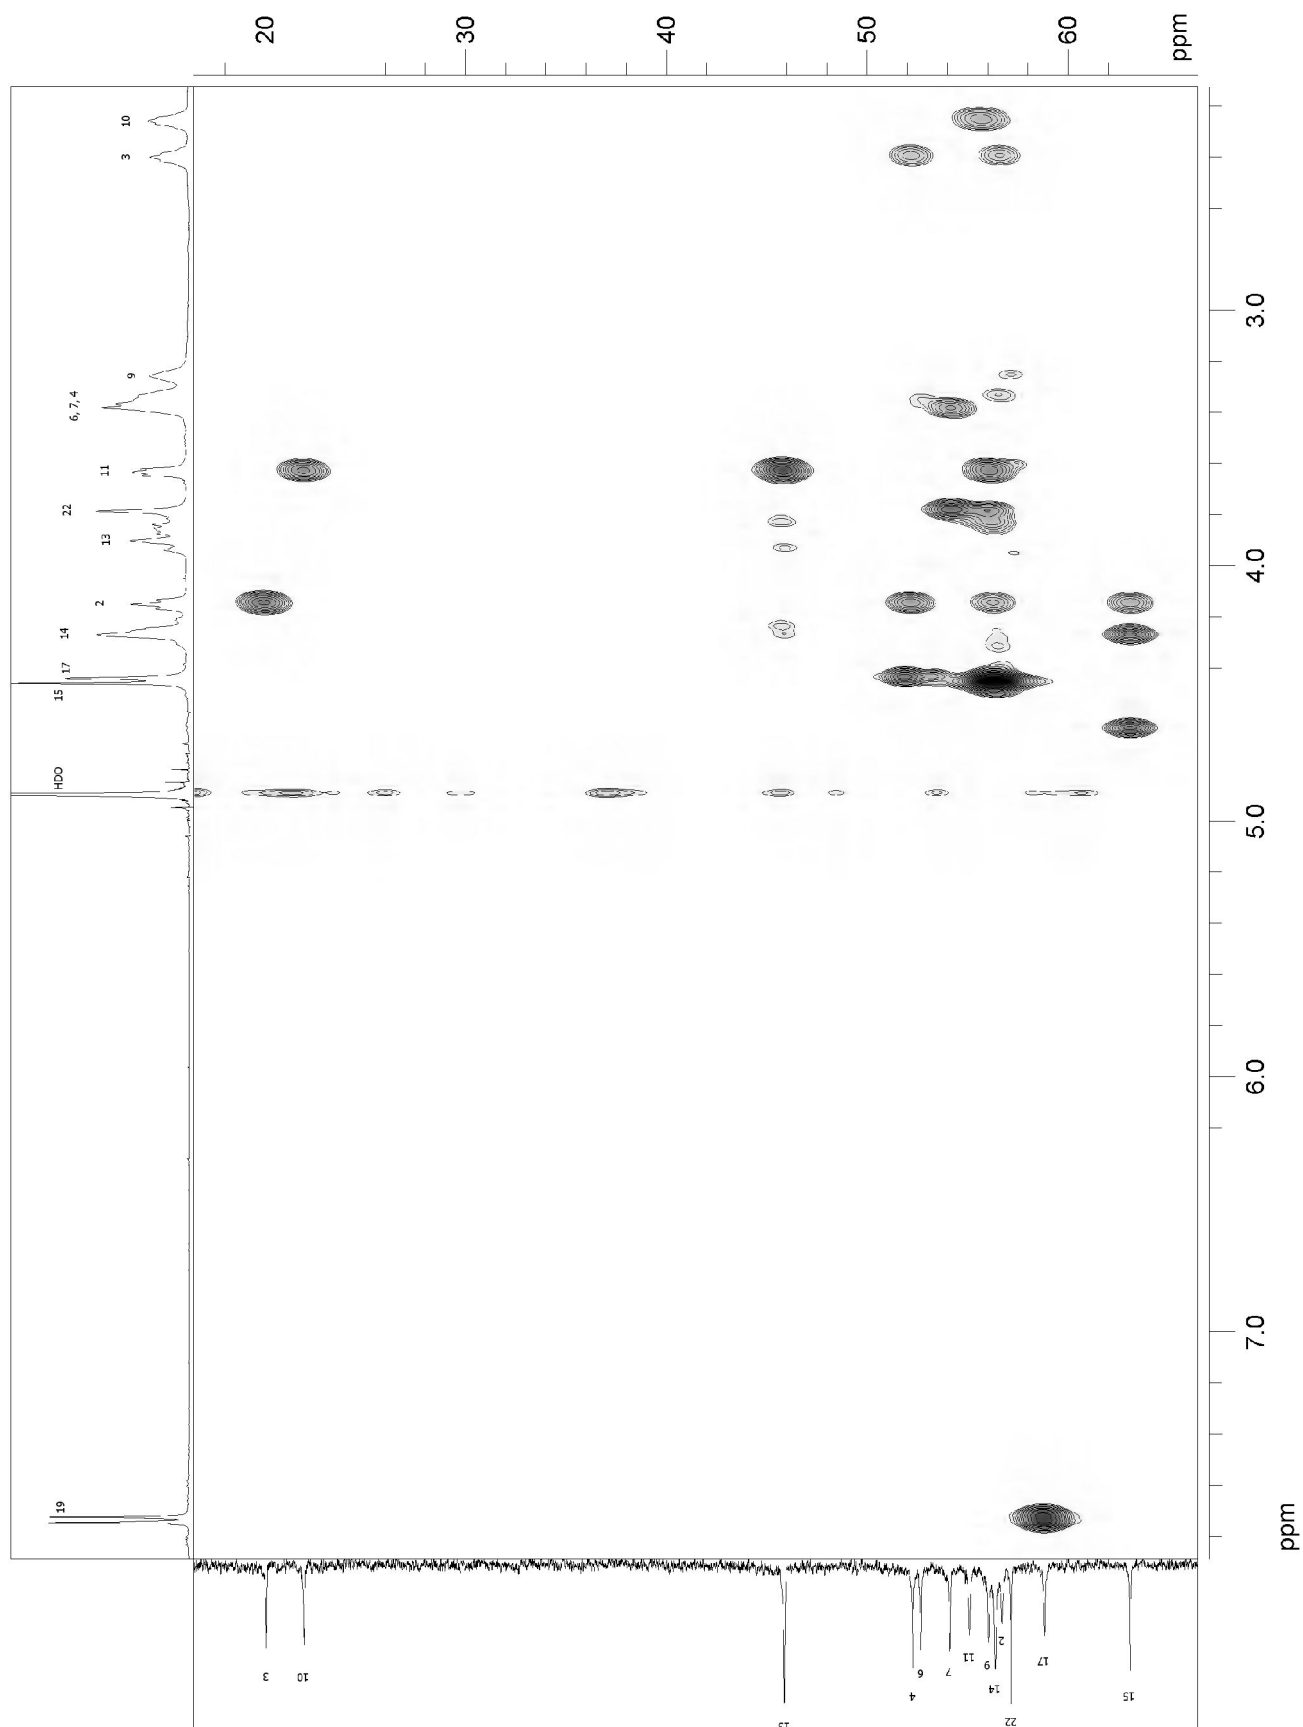

S16 X-ray crystal data collection and refinement details for [Cu(3)Br]PF<sub>6</sub> and 4<sup>Br</sup>·2.5H<sub>2</sub>O

|                                                                           | [Cu(3)Br][PF <sub>6</sub> ]                                                        | 4 <sup>Br</sup> ·2.5H <sub>2</sub> O                               |
|---------------------------------------------------------------------------|------------------------------------------------------------------------------------|--------------------------------------------------------------------|
| Empirical formula                                                         | C <sub>19</sub> H <sub>31</sub> CuN <sub>5</sub> O <sub>2</sub> BrF <sub>6</sub> P | C <sub>21</sub> H <sub>39</sub> N <sub>5</sub> O <sub>6.5</sub> Br |
| <i>fw</i>                                                                 | 649.91                                                                             | 545.48                                                             |
| Crystal shape                                                             | plate                                                                              | prism                                                              |
| Color                                                                     | blue                                                                               | colourless                                                         |
| Crystal system                                                            | triclinic                                                                          | monoclinic                                                         |
| Space group                                                               | <i>P</i> $\bar{1}$ (No. 2)                                                         | <i>C</i> 2/c (No. 15)                                              |
| <i>a</i> (Å)                                                              | 6.9960(4)                                                                          | 19.4788(4)                                                         |
| <i>b</i> (Å)                                                              | 10.2570(8)                                                                         | 19.7272(4)                                                         |
| <i>c</i> (Å)                                                              | 17.8780(15)                                                                        | 13.7214(3)                                                         |
| $\alpha$ (deg)                                                            | 73.592(3)                                                                          | 90                                                                 |
| $\beta$ (deg)                                                             | 84.539(5)                                                                          | 97.7160(11)                                                        |
| $\gamma$ (deg)                                                            | 80.636(4)                                                                          | 90                                                                 |
| <i>V</i> (Å <sup>3</sup> )                                                | 1212.60(16)                                                                        | 5224.88(19)                                                        |
| <i>Z</i>                                                                  | 2                                                                                  | 8                                                                  |
| $\rho_{\text{calc}}$ (g·cm <sup>-3</sup> )                                | 1.780                                                                              | 1.387                                                              |
| <i>T</i> (K)                                                              | 150(1)                                                                             | 150(1)                                                             |
| $\mu$ (mm <sup>-1</sup> )                                                 | 2.688                                                                              | 1.619                                                              |
| <i>F</i> (000)                                                            | 658                                                                                | 2296                                                               |
| $\theta$ range of data collection (deg)                                   | 2.09–27.47                                                                         | 3.44–27.50                                                         |
| Index ranges, <i>hkl</i>                                                  | –8 to 7, –13 to 13, –23 to 23                                                      | –25 to 25, –25 to 25, –17 to 17                                    |
| Reflections measured                                                      | 5090                                                                               | 5978                                                               |
| Reflections observed [ <i>I</i> > 2 $\sigma$ ( <i>I</i> )]                | 3452                                                                               | 4839                                                               |
| Data, restraints, parameters                                              | 5090, 0, 327                                                                       | 5978, 0, 311                                                       |
| Goodness-of-fit on <i>F</i> <sup>2</sup>                                  | 1.993                                                                              | 1.045                                                              |
| Wavelength (Å)                                                            | 0.71073                                                                            | 0.71073                                                            |
| <i>R</i> , <i>R'</i> [ <i>I</i> > 2 $\sigma$ ( <i>I</i> )] <sup>†</sup>   | 0.2134, 0.1759                                                                     | 0.0736, 0.0590                                                     |
| <i>wR</i> , <i>wR'</i> [ <i>I</i> ≥ 2 $\sigma$ ( <i>I</i> )] <sup>†</sup> | 0.5043, 0.4889                                                                     | 0.1828, 0.1680                                                     |
| Maximum shift/esd                                                         | 0.004                                                                              | 0.000                                                              |
| $\Delta\rho_{\text{max, min}}$ (e·Å <sup>-3</sup> )                       | 2.415, –2.128                                                                      | 0.907, –0.935                                                      |

$$w = 1/[\sigma^2(F_o^2) + (AP)^2 + BP], P = (F_o^2 + 2F_c^2)/3; R, R' = \sum|F_o - F_c|/\sum|F_c|, wR, wR' = [\sum w(F_o^2 - F_c^2)^2/\sum w(F_o^2)^2]^{1/2}$$



S17 Distribution of species in solutions† of **3**

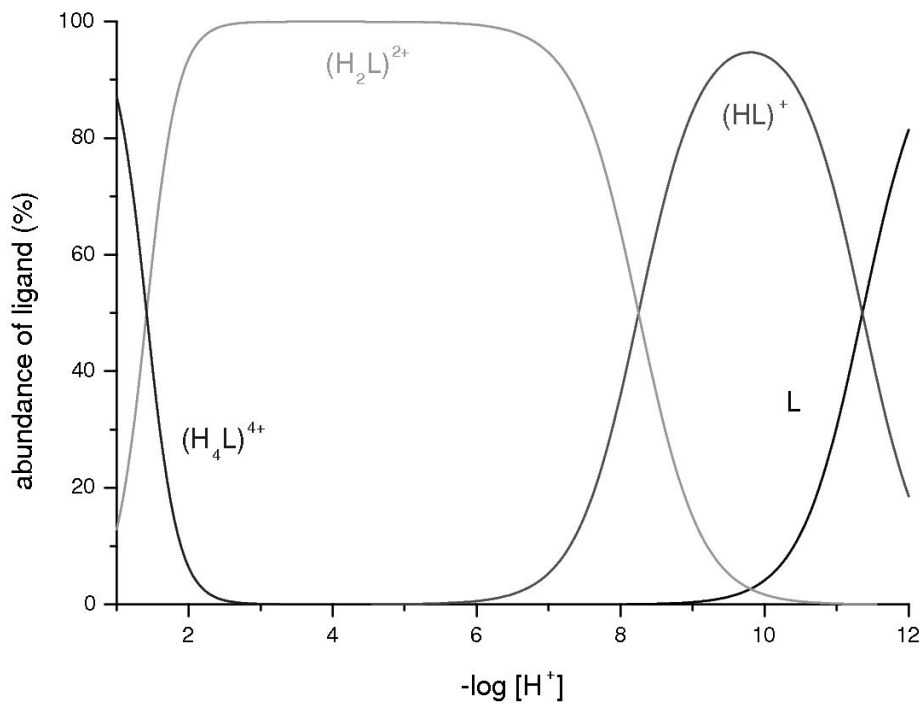

S18 Distribution of species in system  $Cu^{II} / 3^{\dagger}$

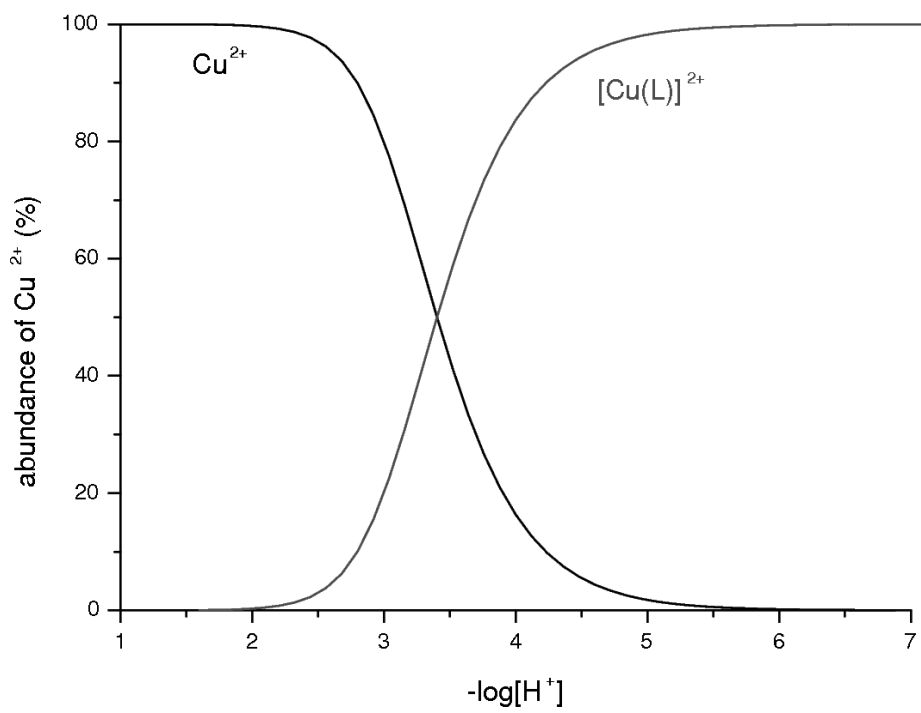

† 0.1 M aq.  $KNO_3$ , 25 °C

S19 Distribution of species in system  $\text{Zn}^{\text{II}} / \mathbf{3}^{\dagger}$

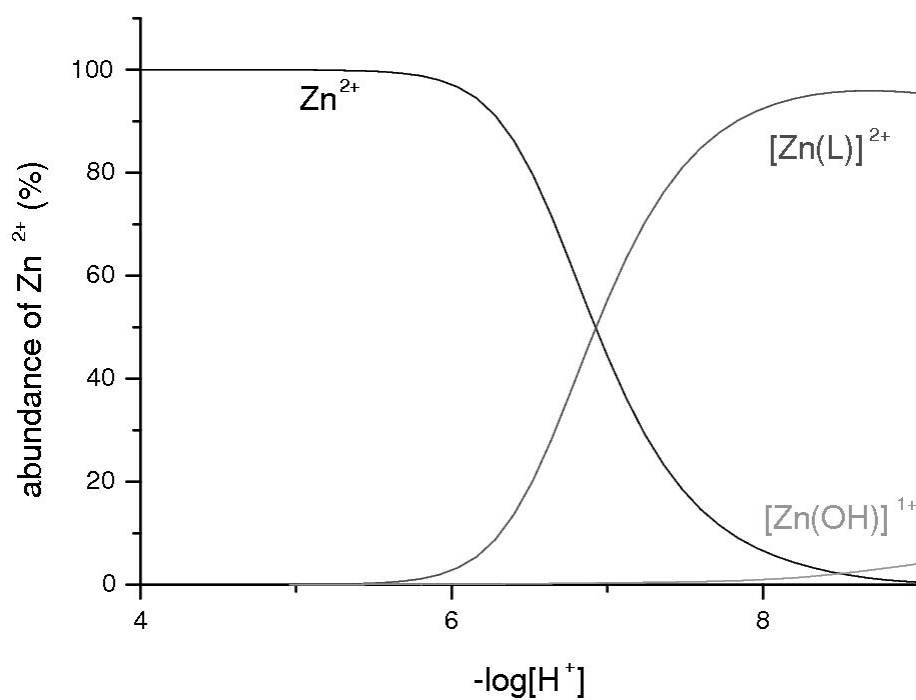

S20 Distribution of species in solutions<sup>†</sup> of **6**

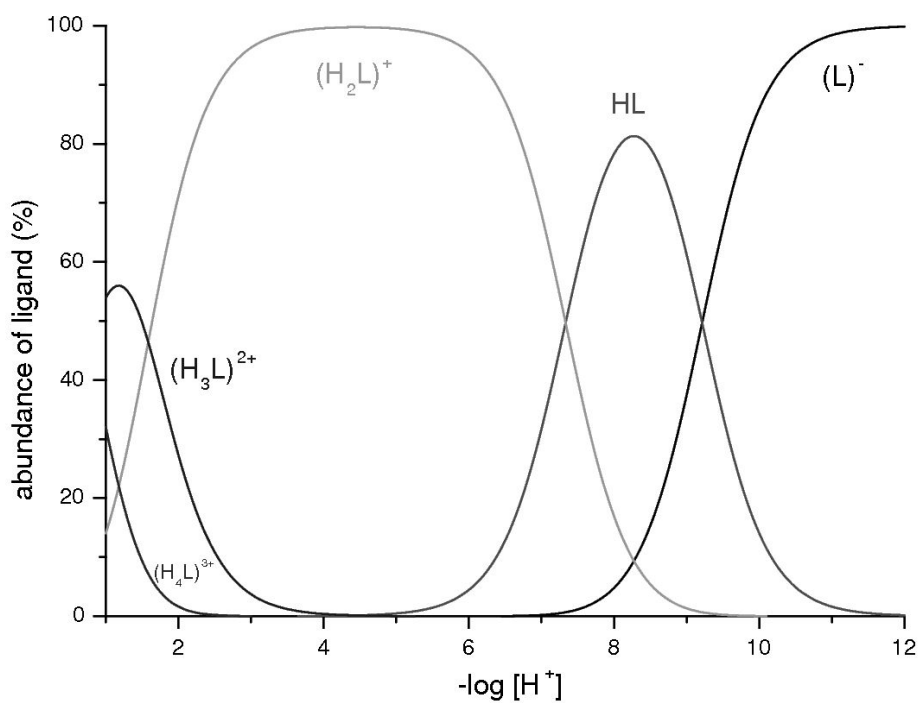

<sup>†</sup> 0.1 M aq.  $\text{KNO}_3$ , 25 °C

S21 Distribution of species in system  $\text{Cu}^{\text{II}} / \mathbf{6}^{\dagger}$

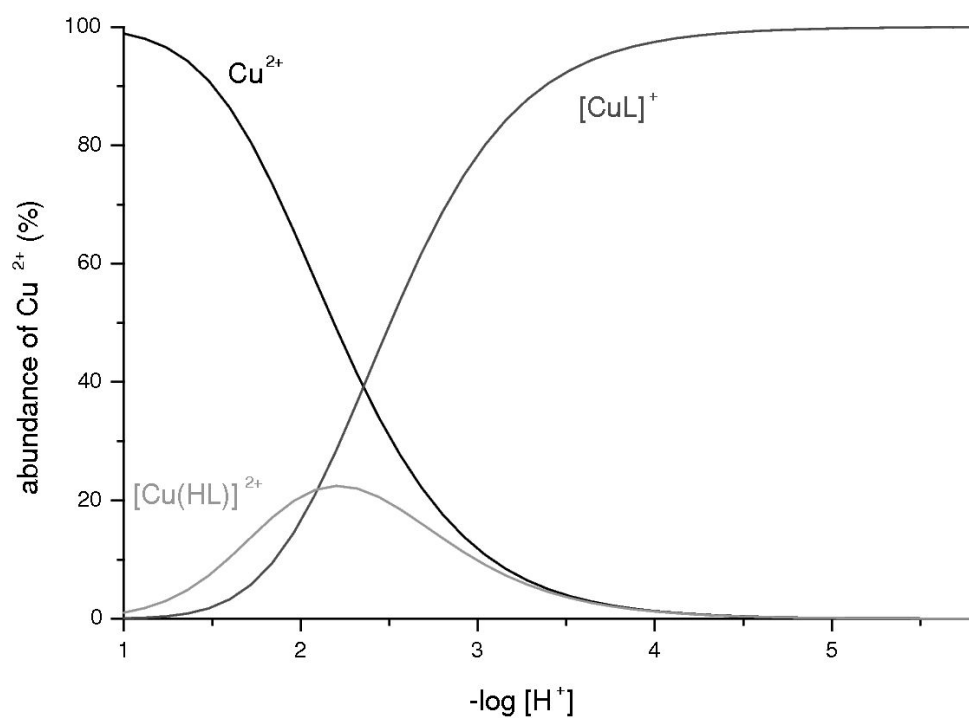

S22 Distribution of species in system  $\text{Zn}^{\text{II}} / \mathbf{6}^{\dagger}$

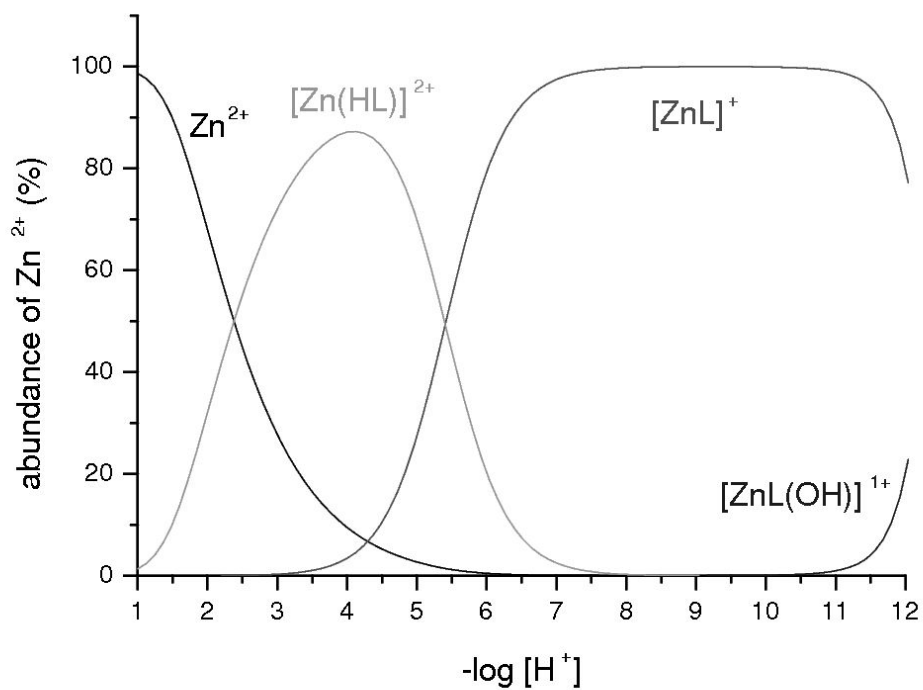

† 0.1 M aq.  $\text{KNO}_3$ , 25 °C
